# Supplementary material for: Genetic diversity in global chicken breeds in relation to their genetic distances to wild populations
Source: PubMed Central journal article supplement (PMC8048360; doi:10.1186/s12711-021-00628-z), 2021-04-14

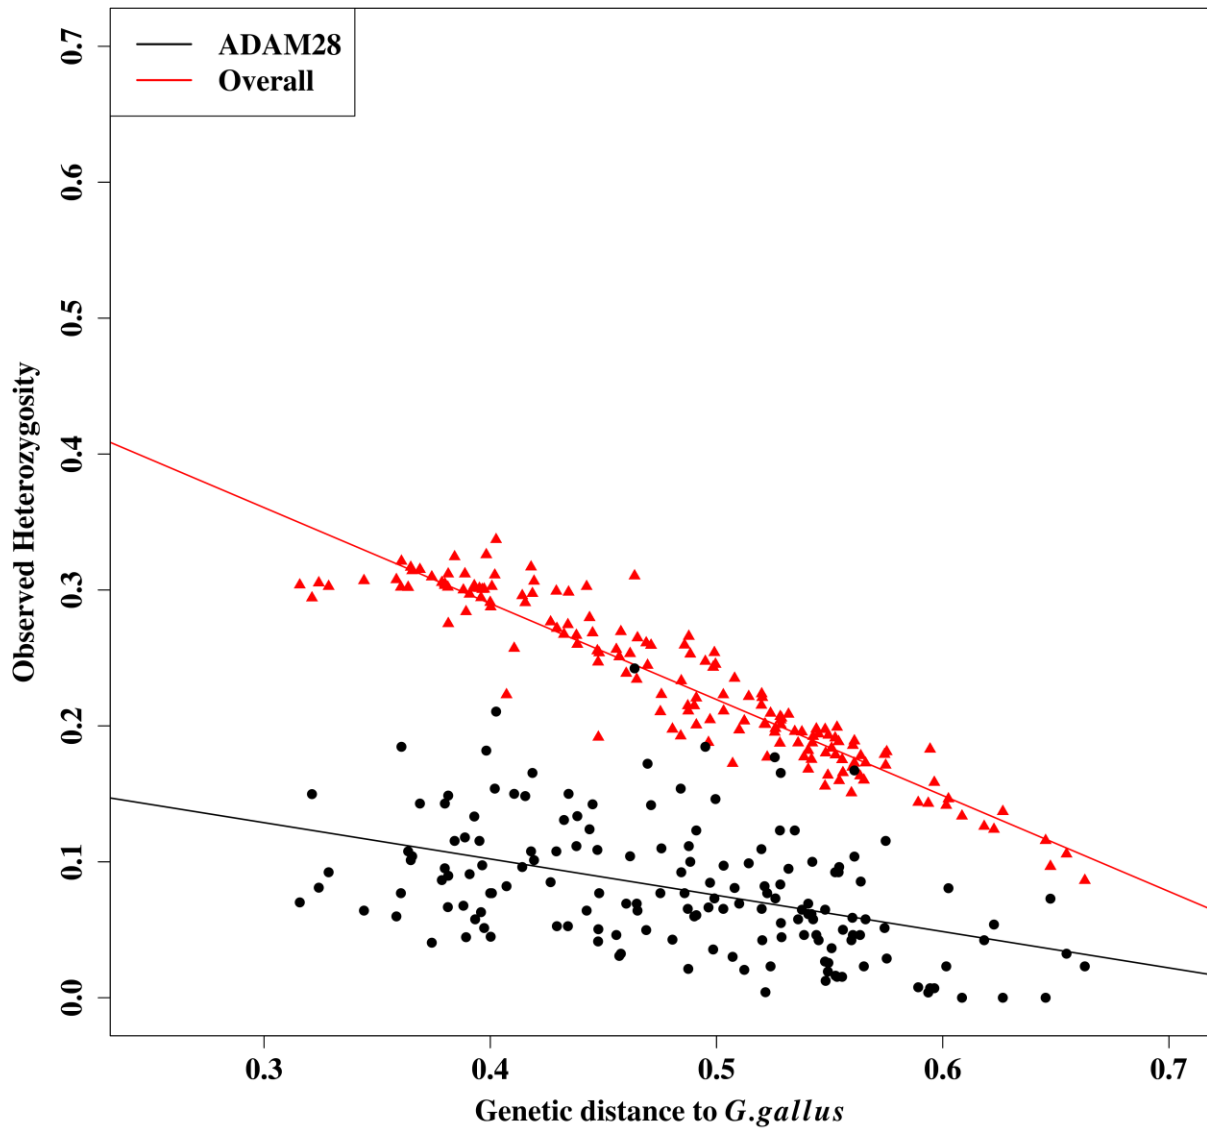

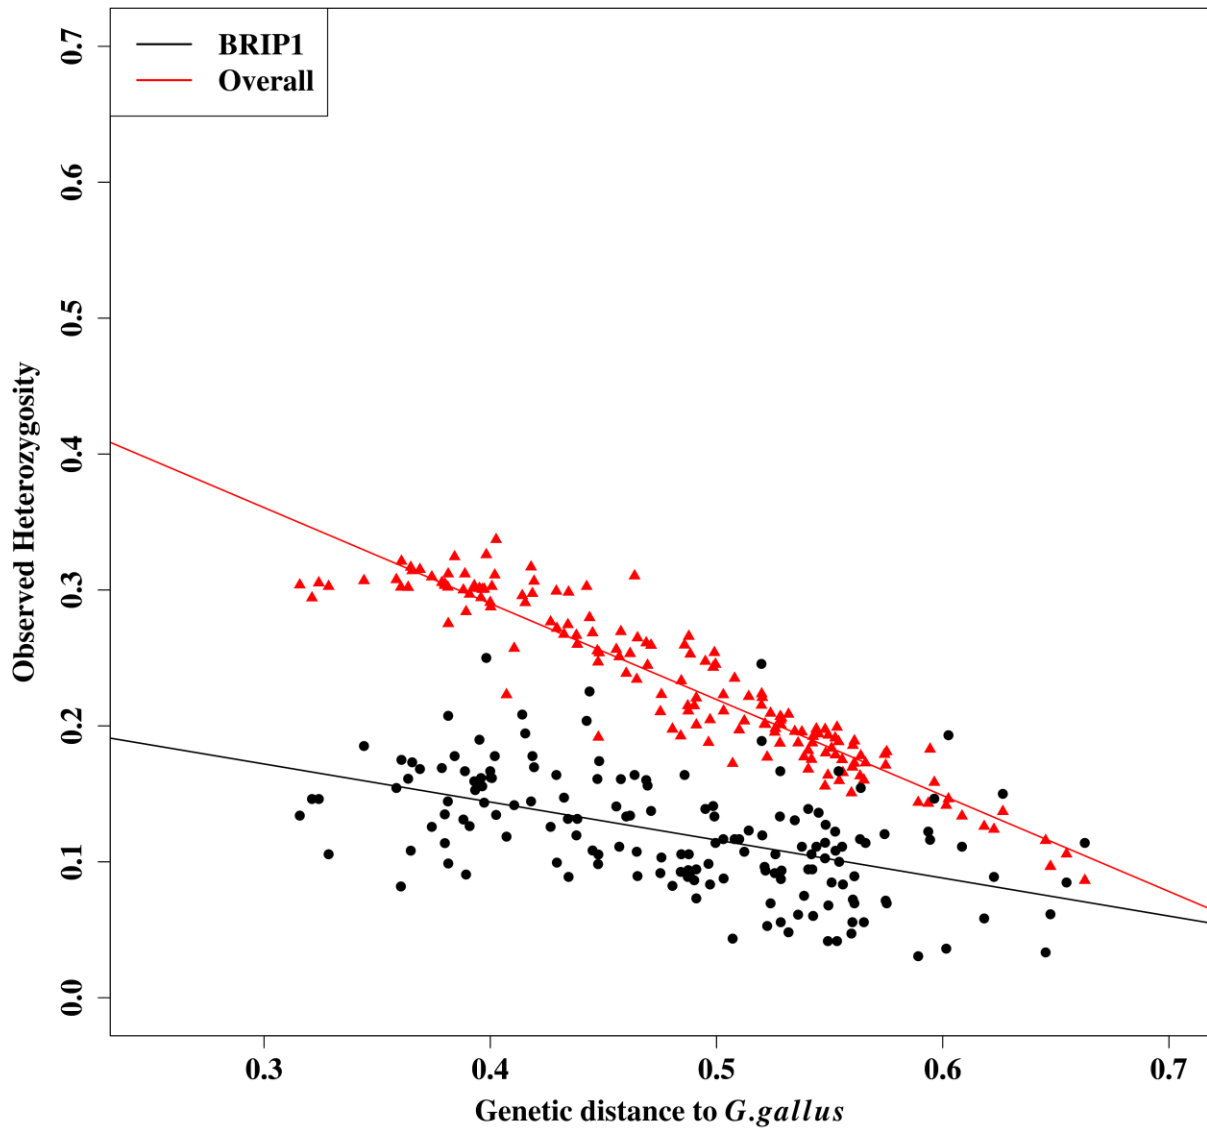

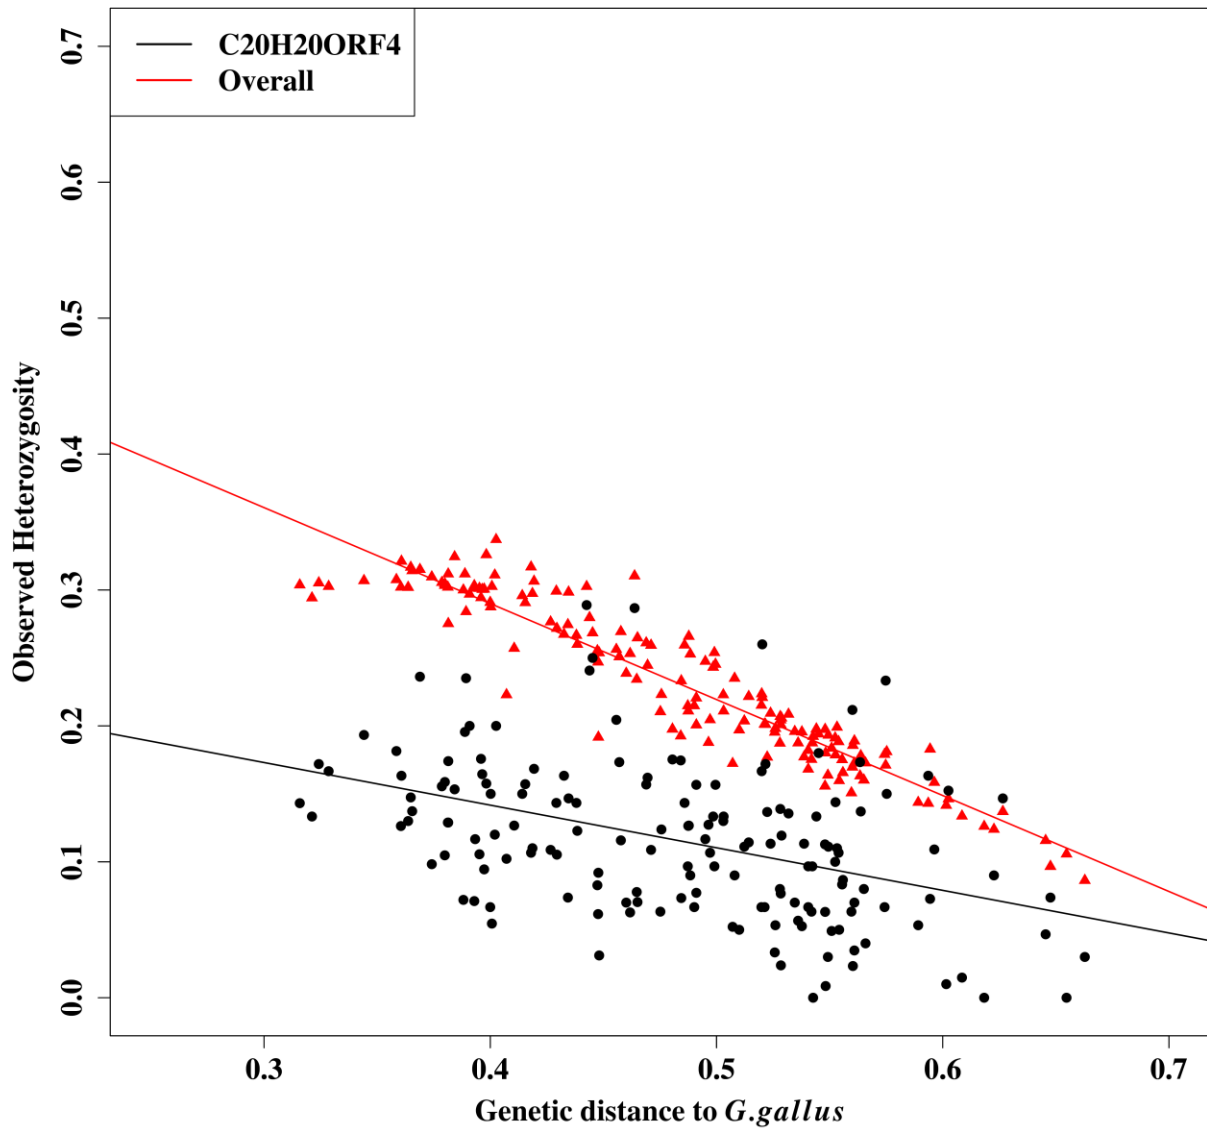

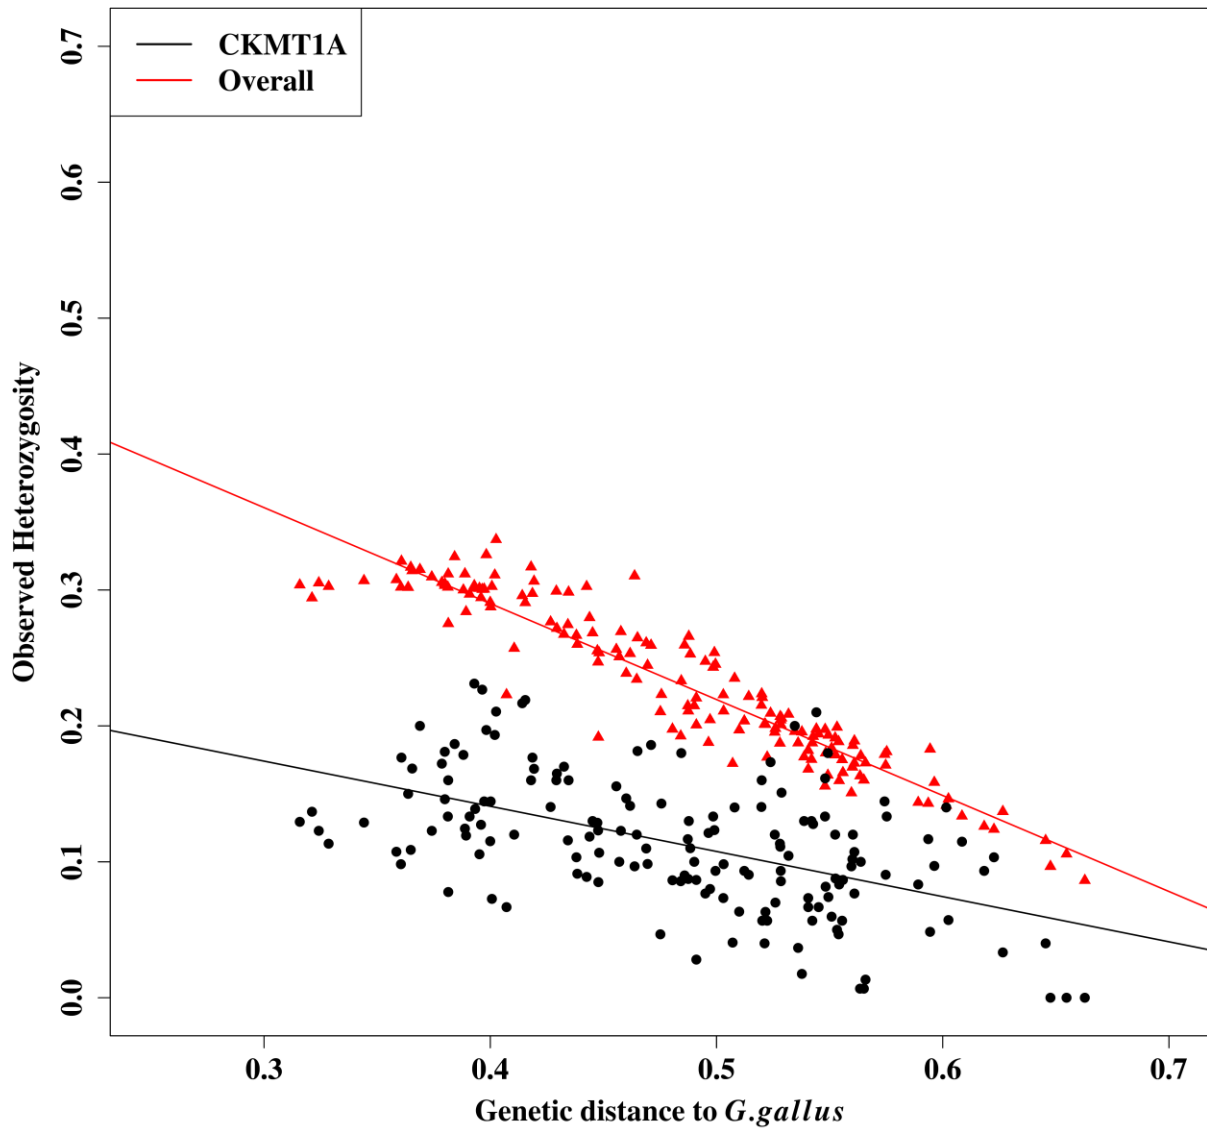

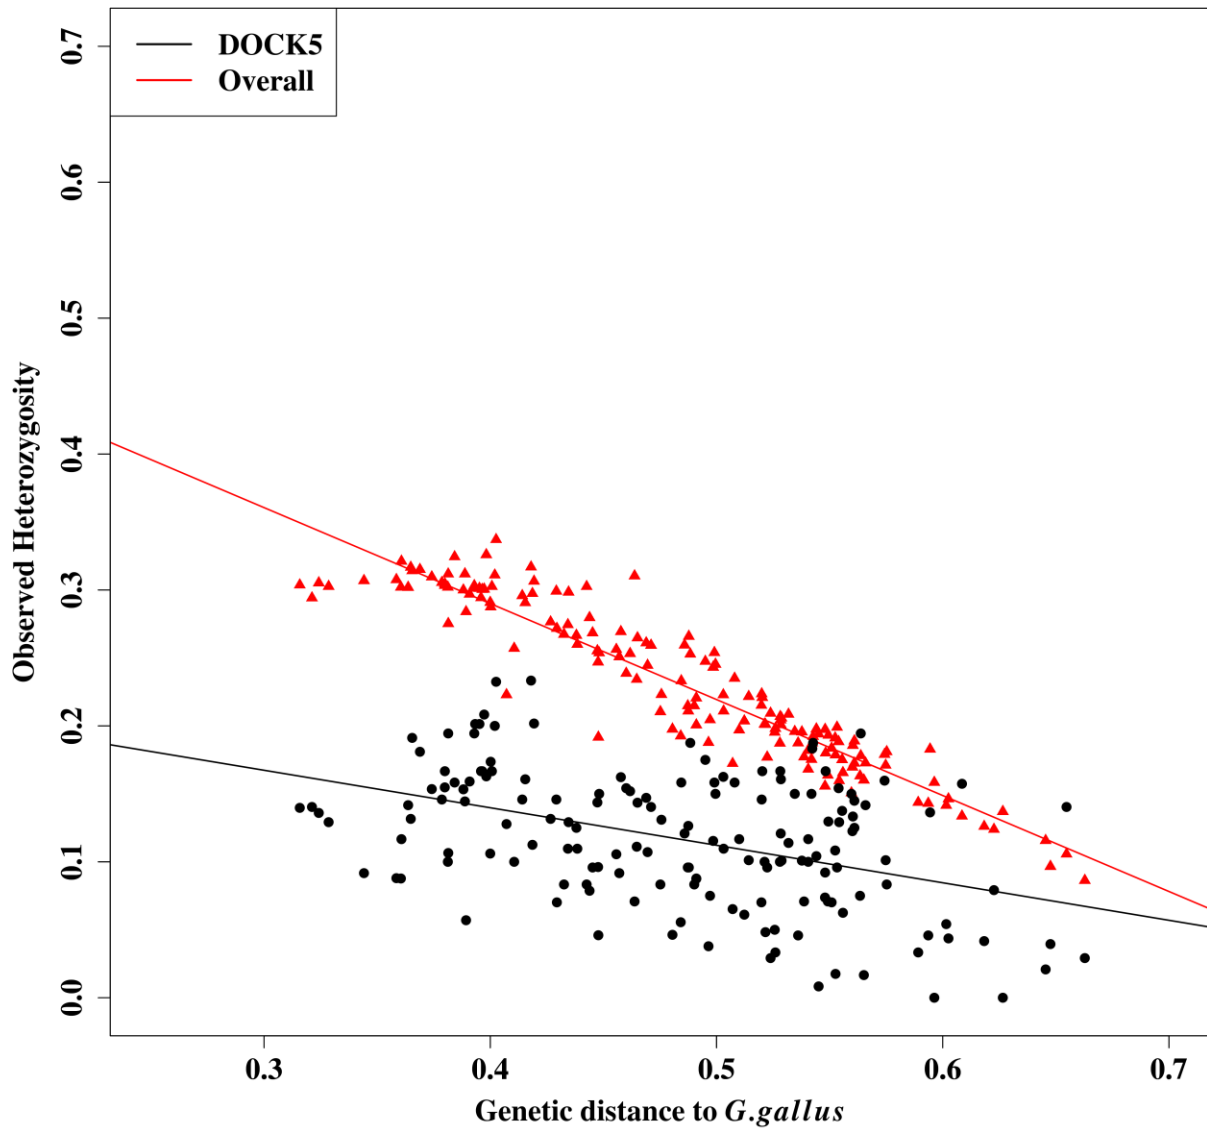

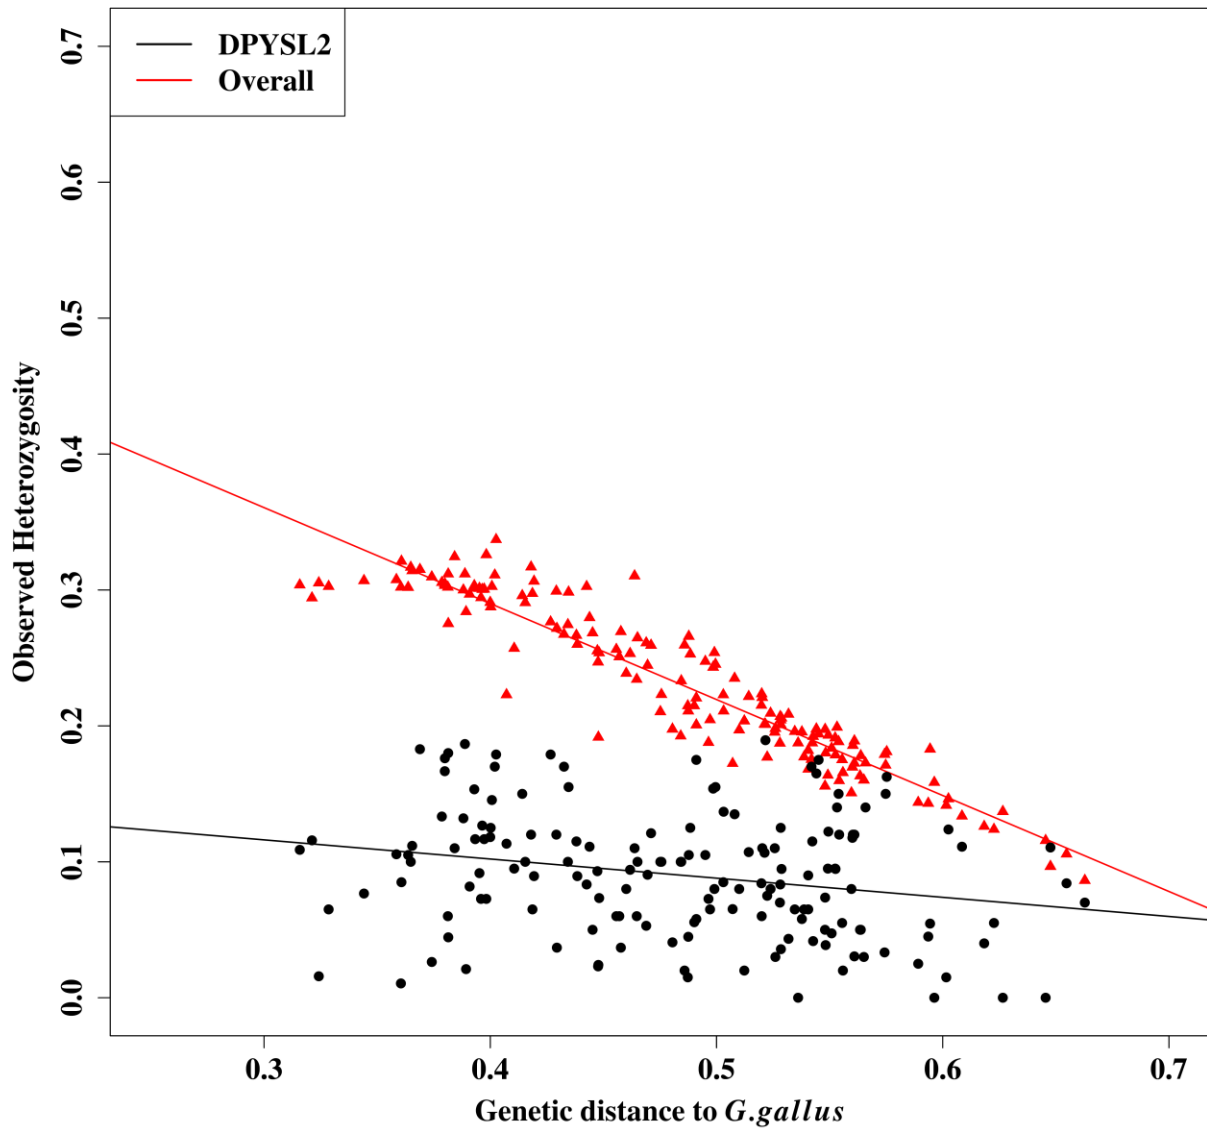

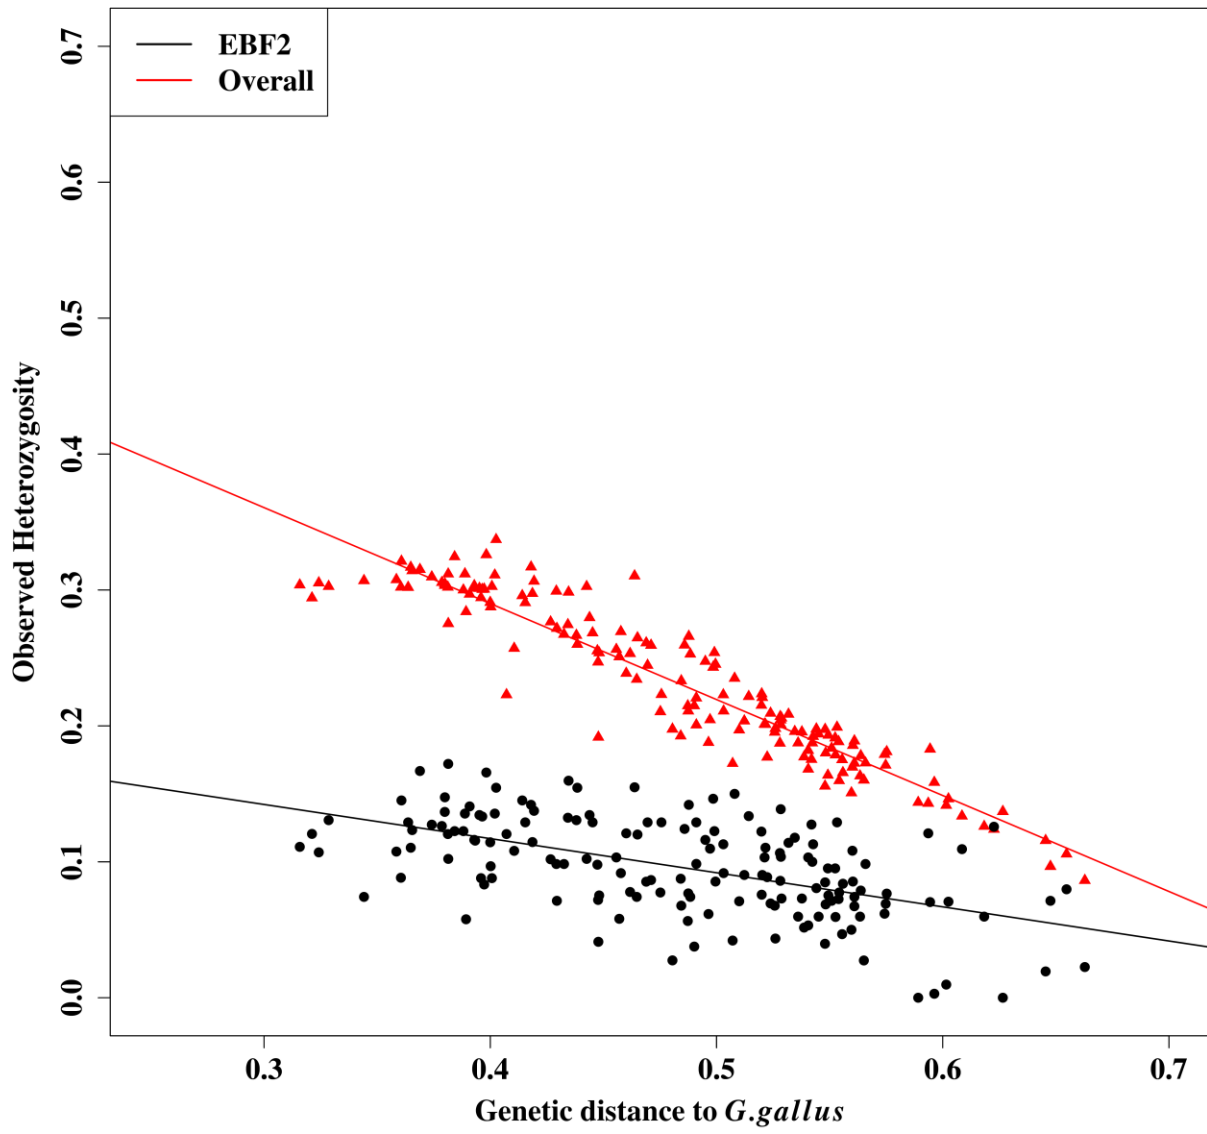

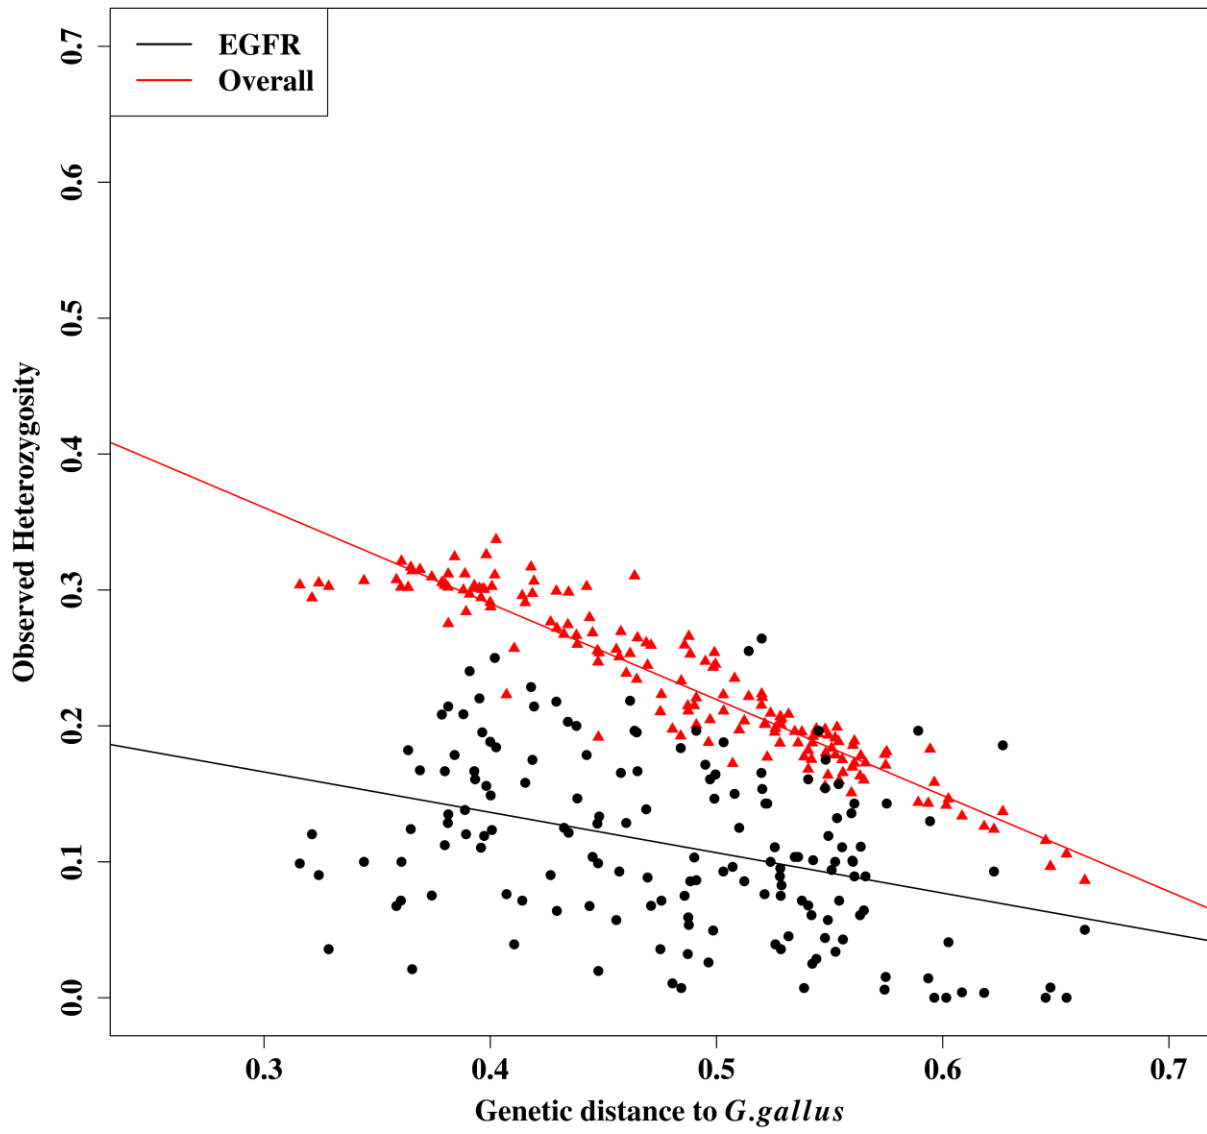



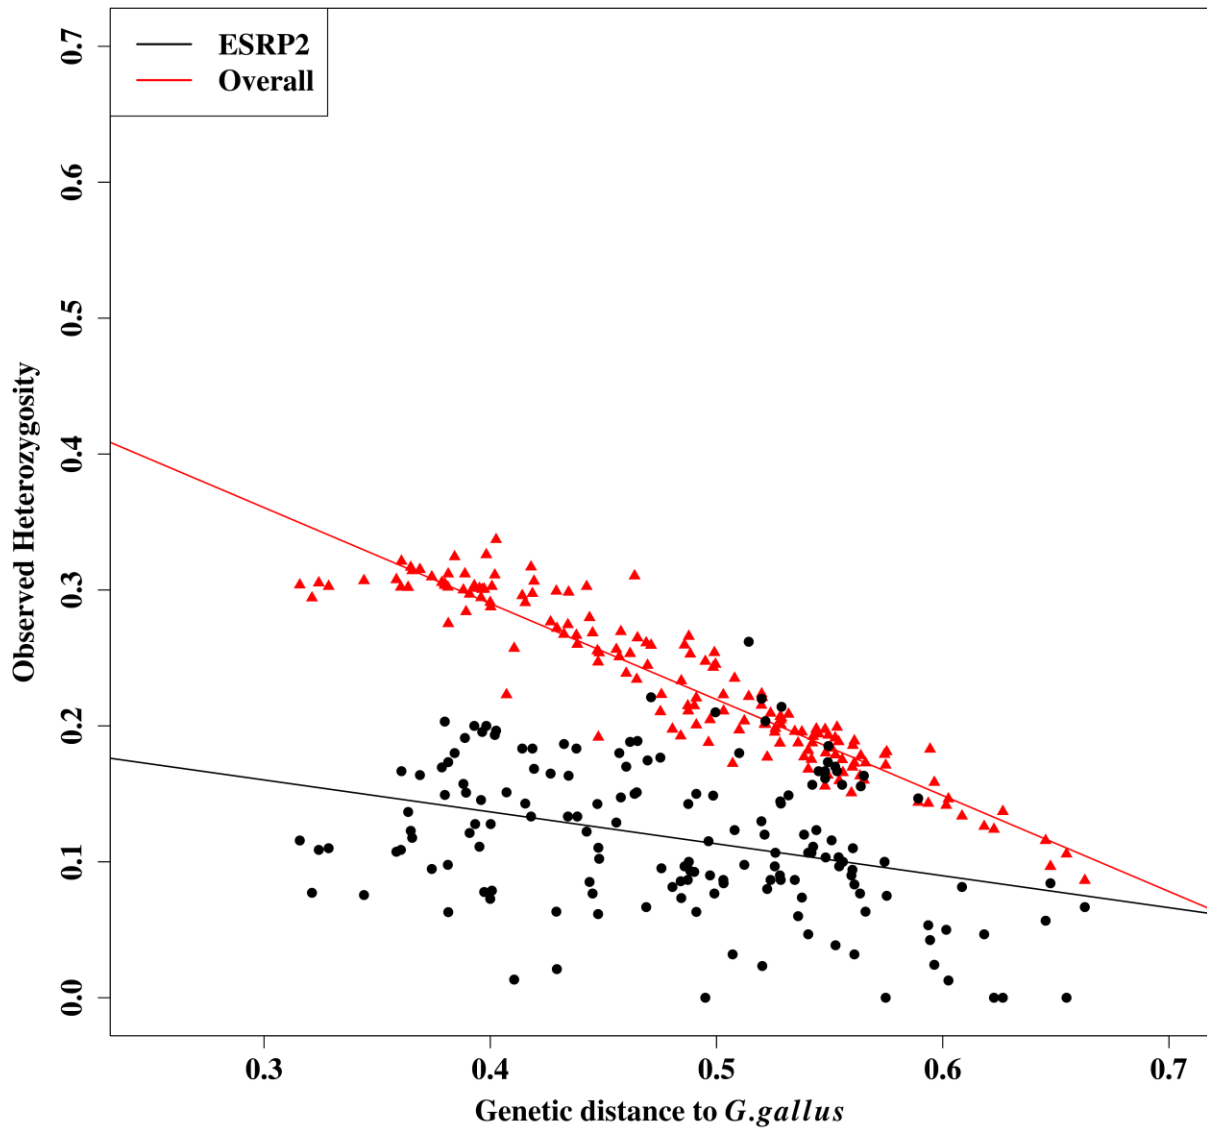

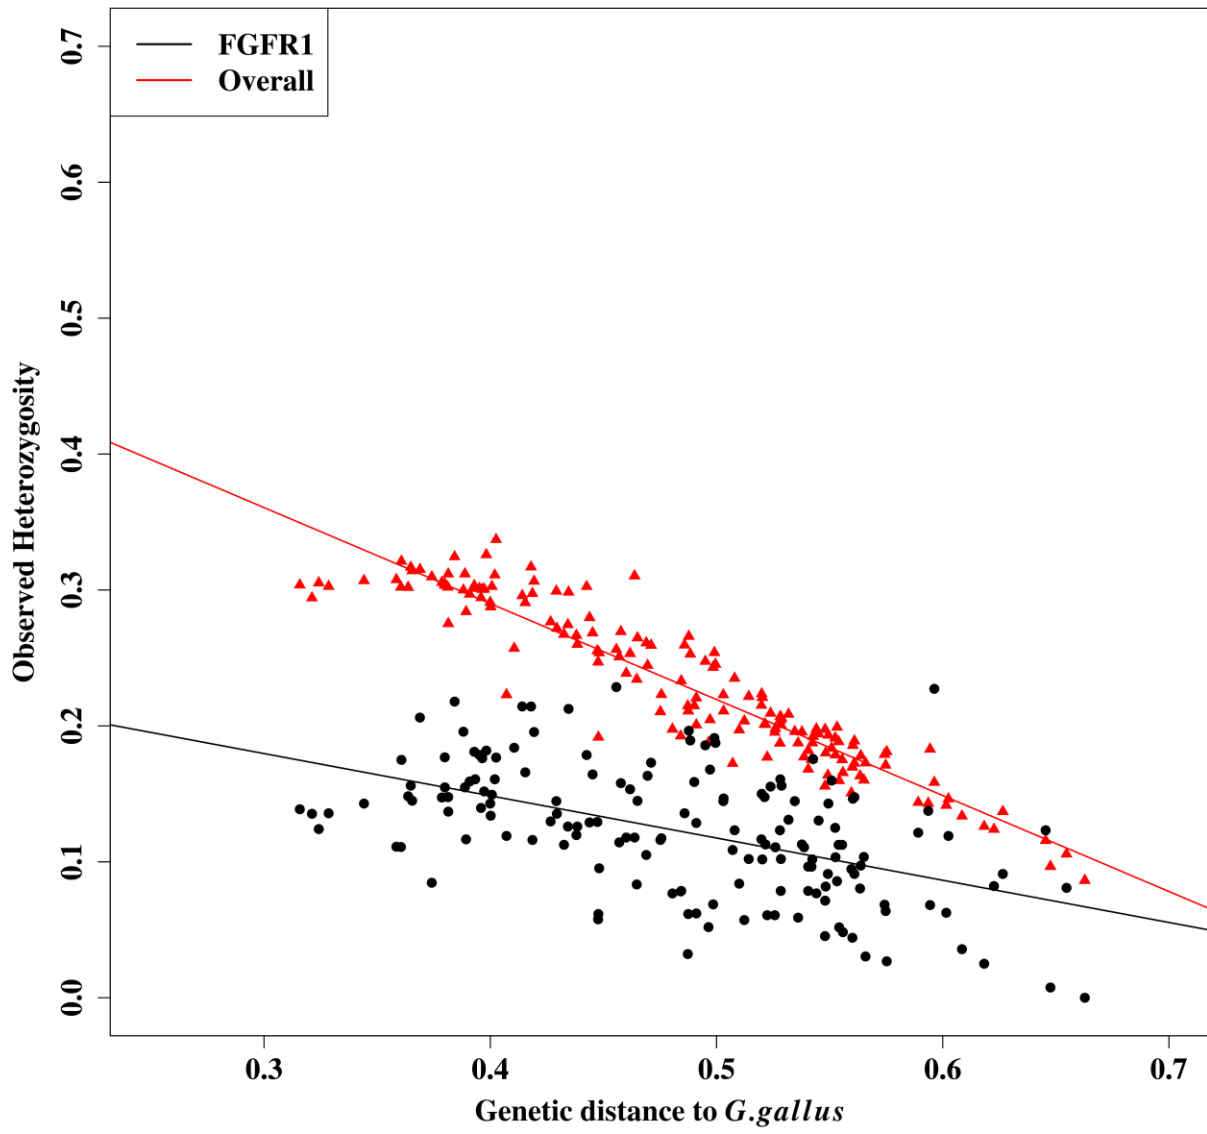

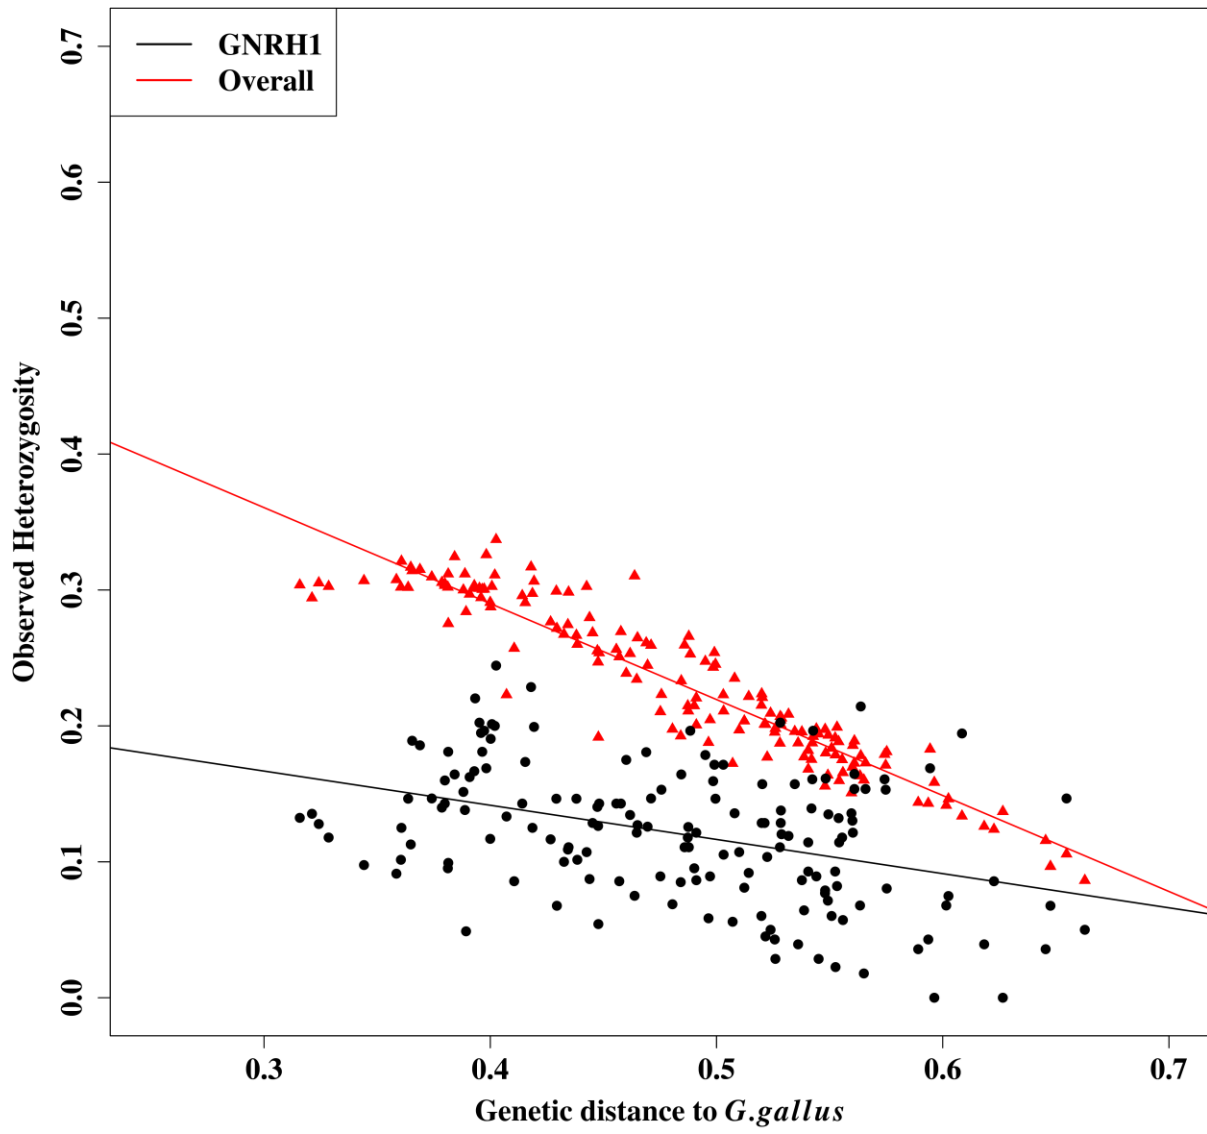

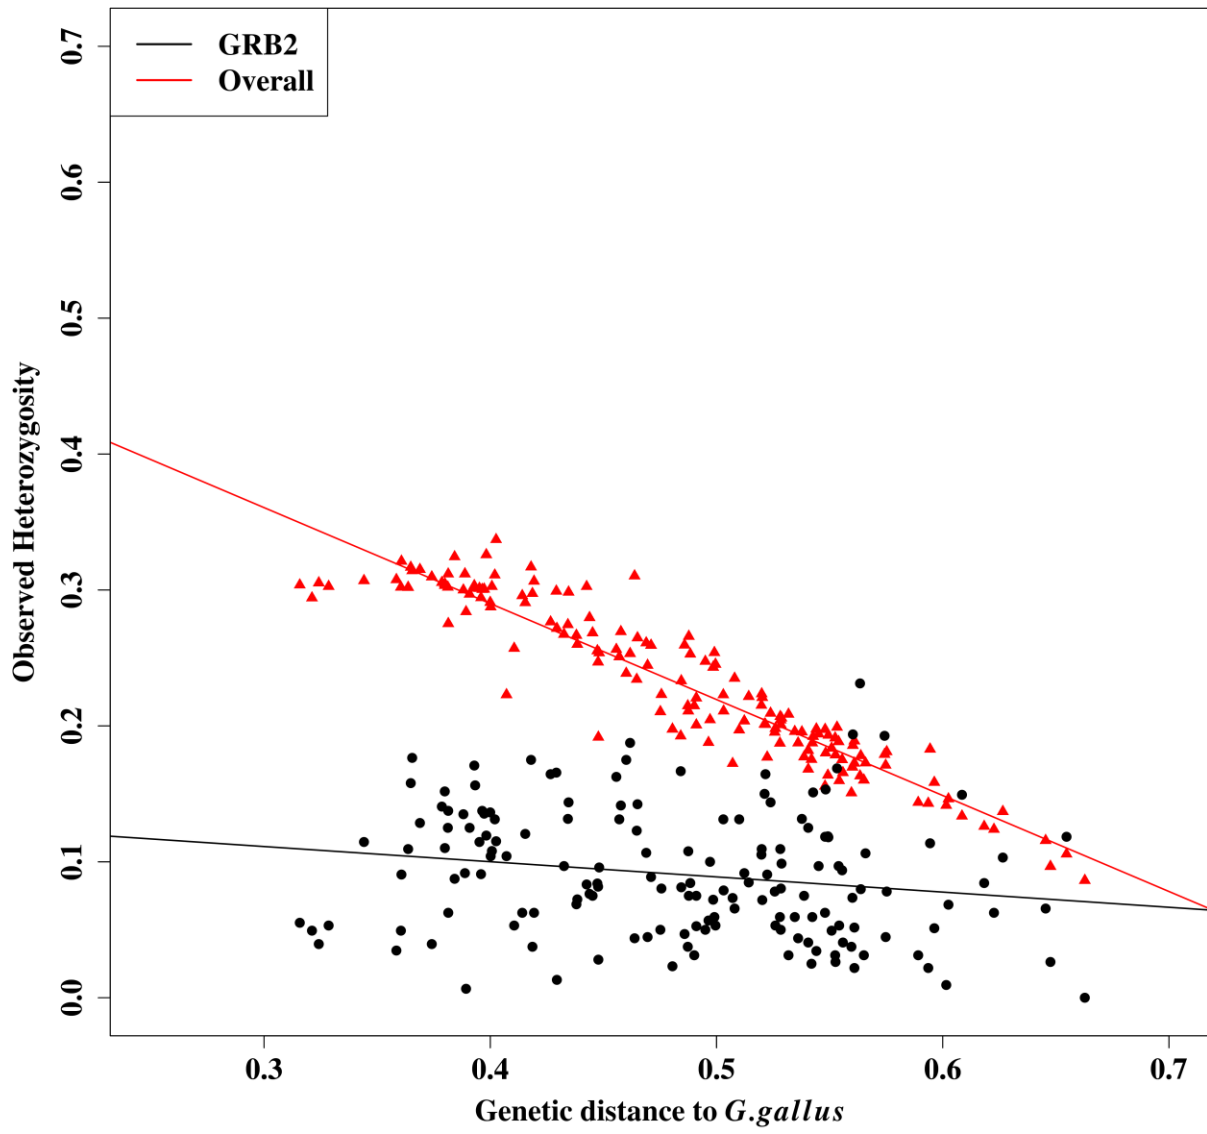

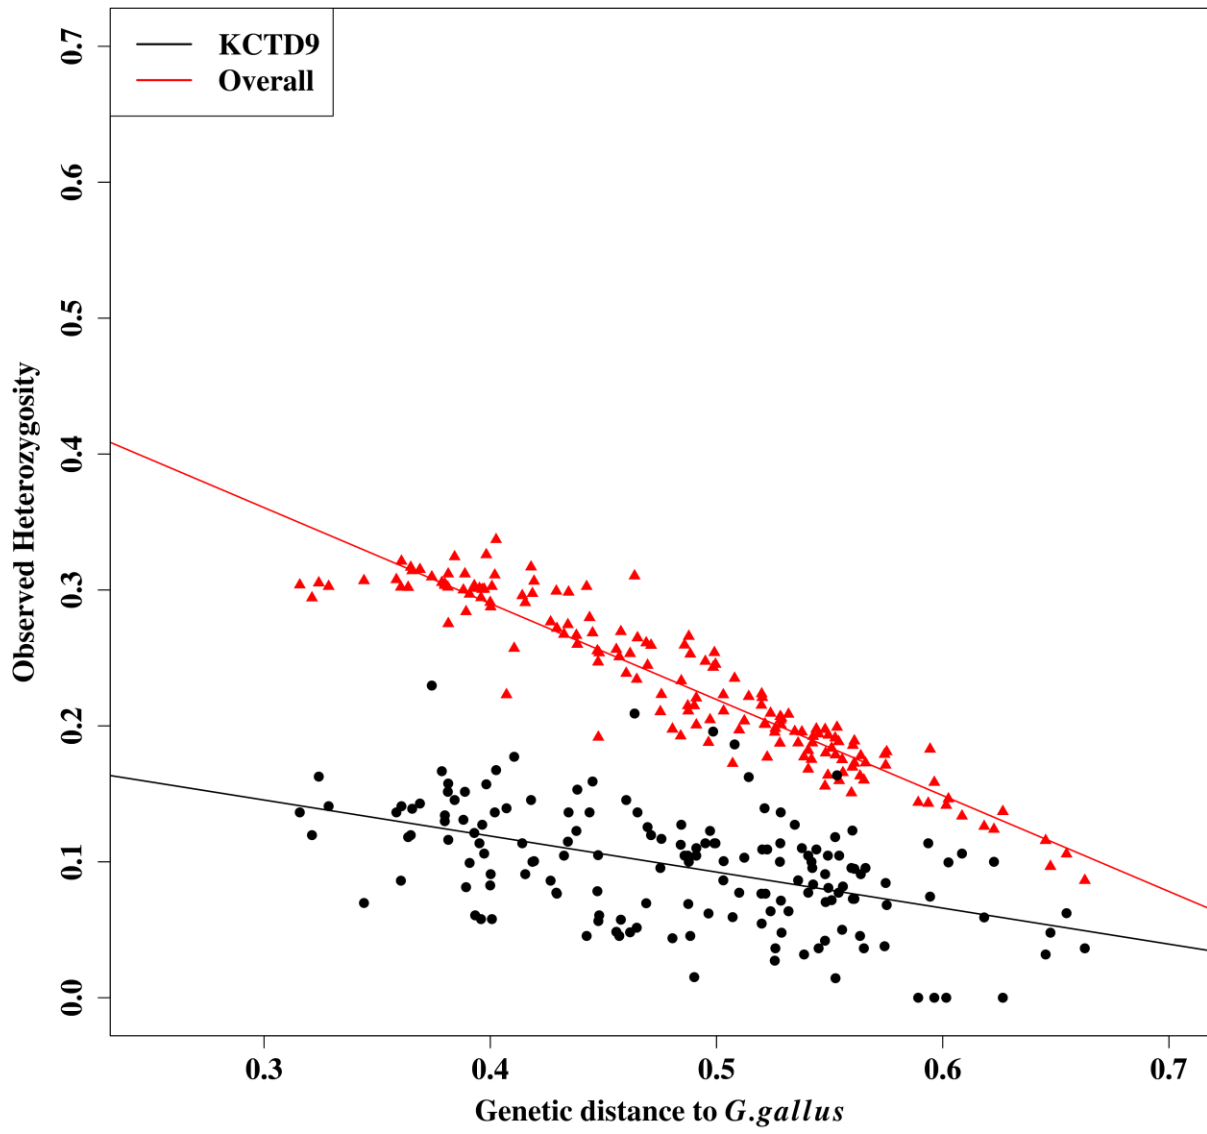

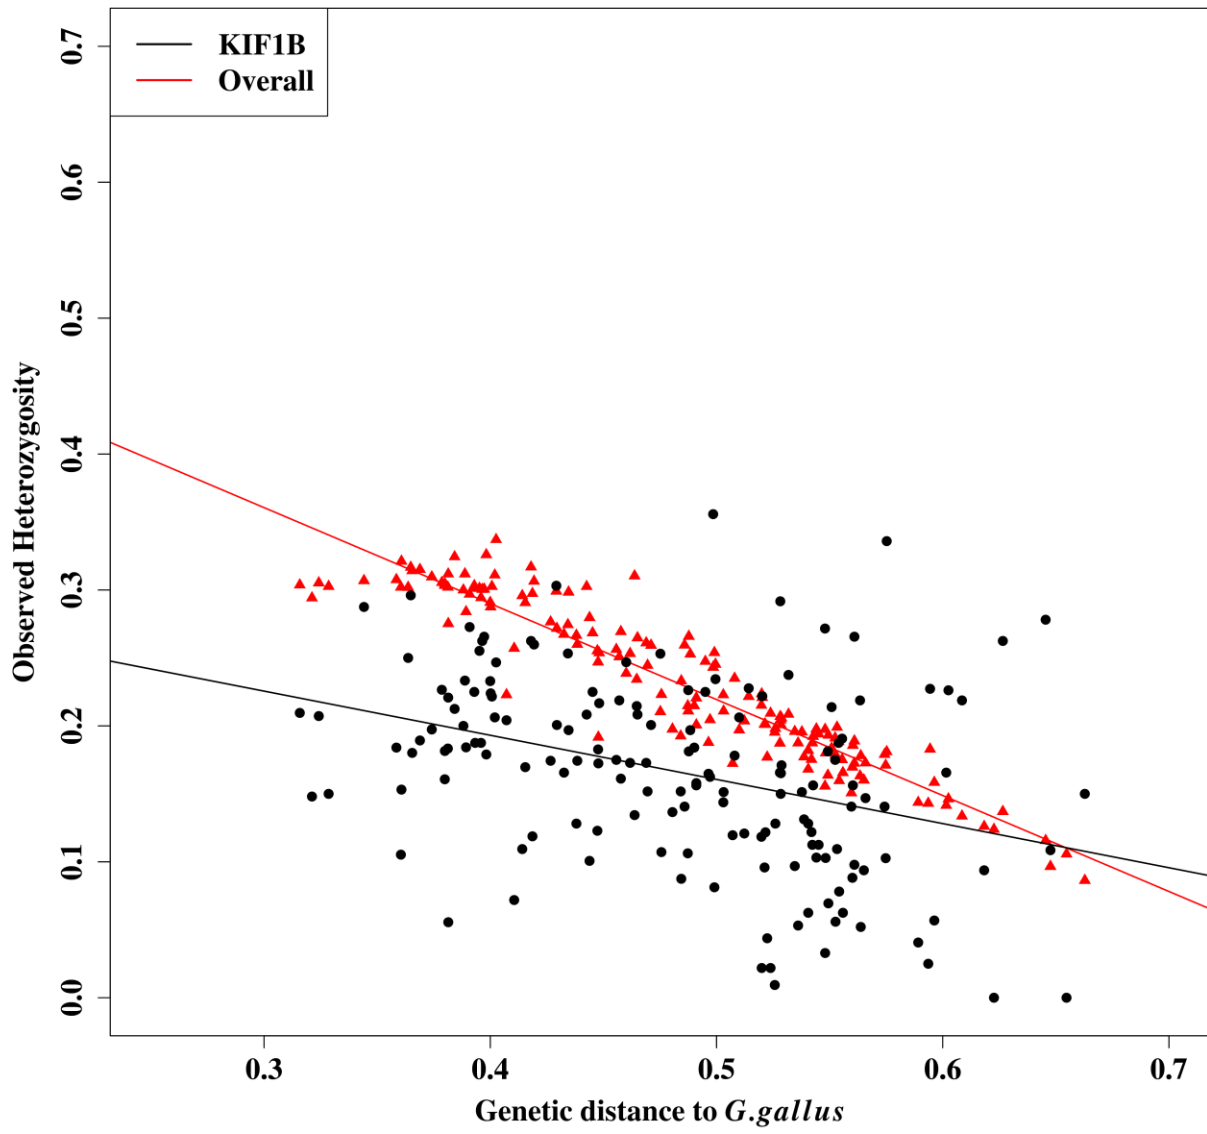

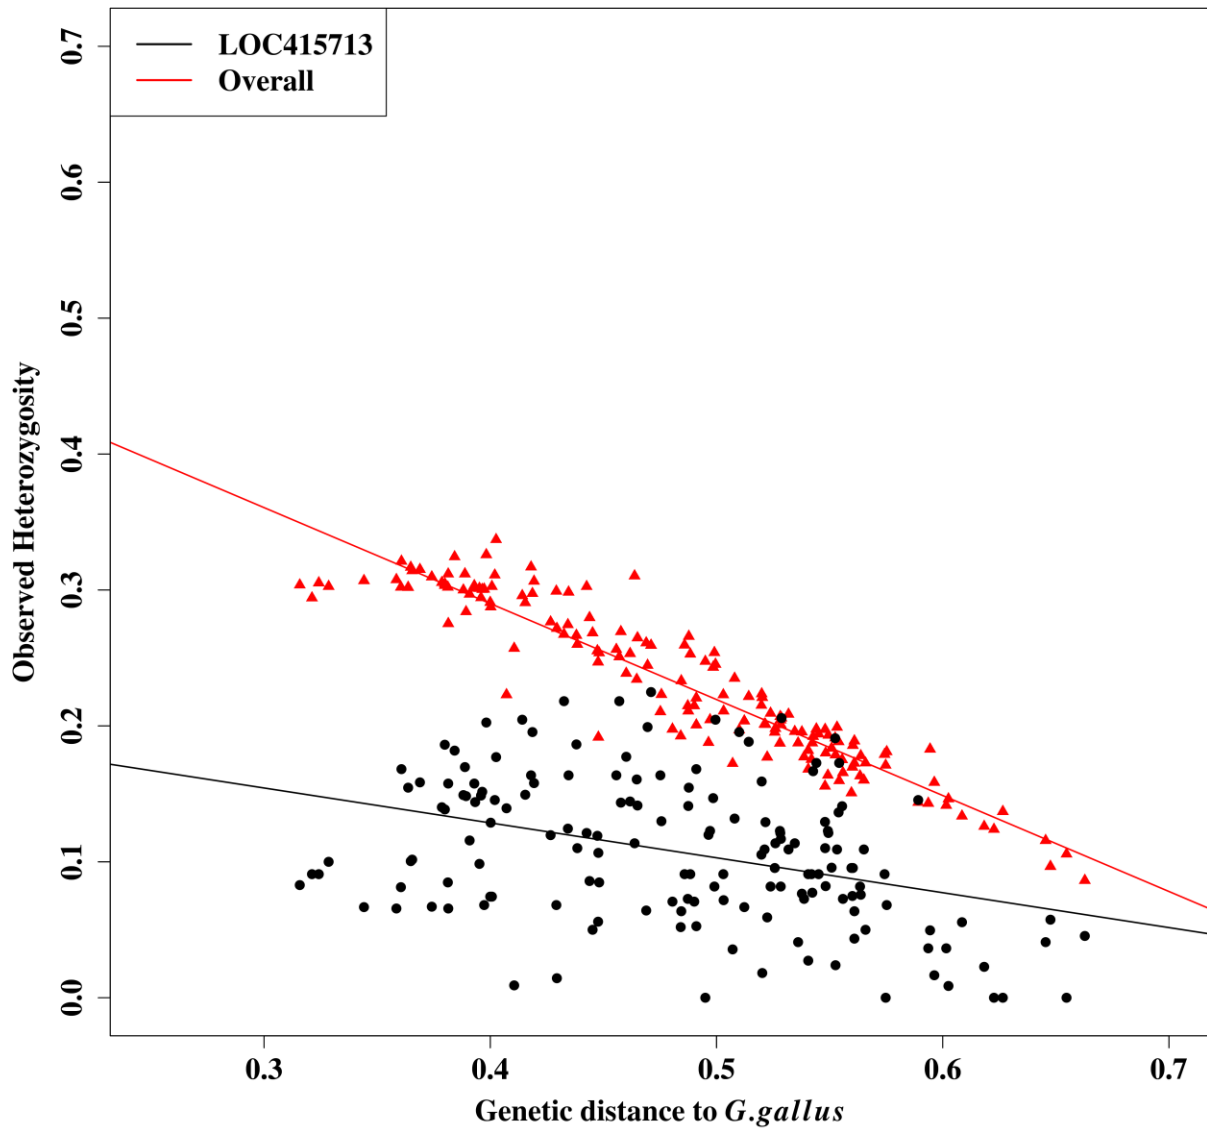

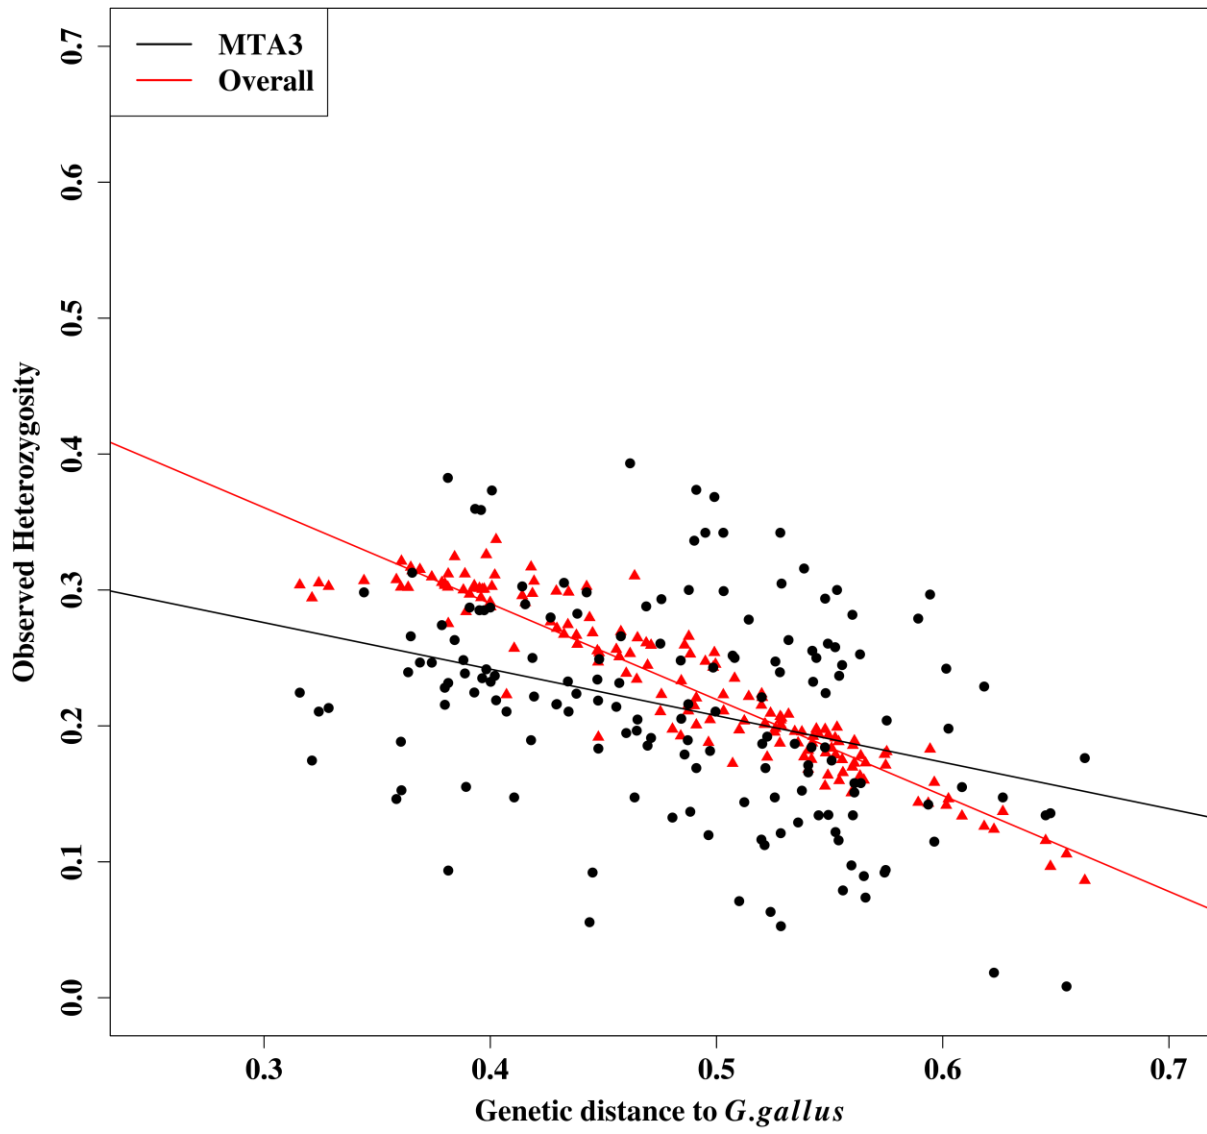



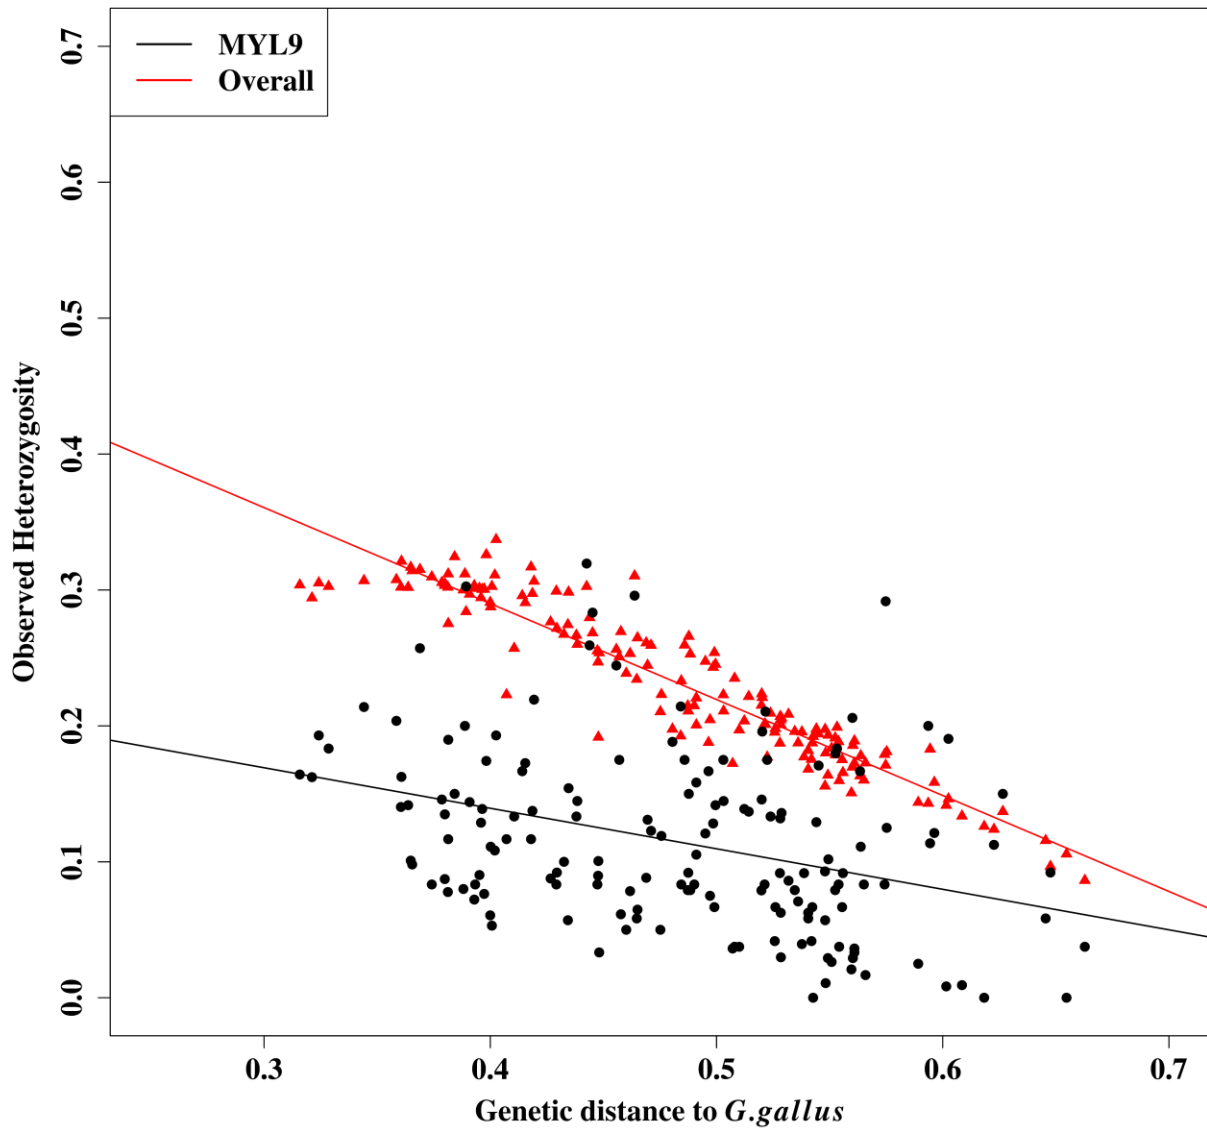

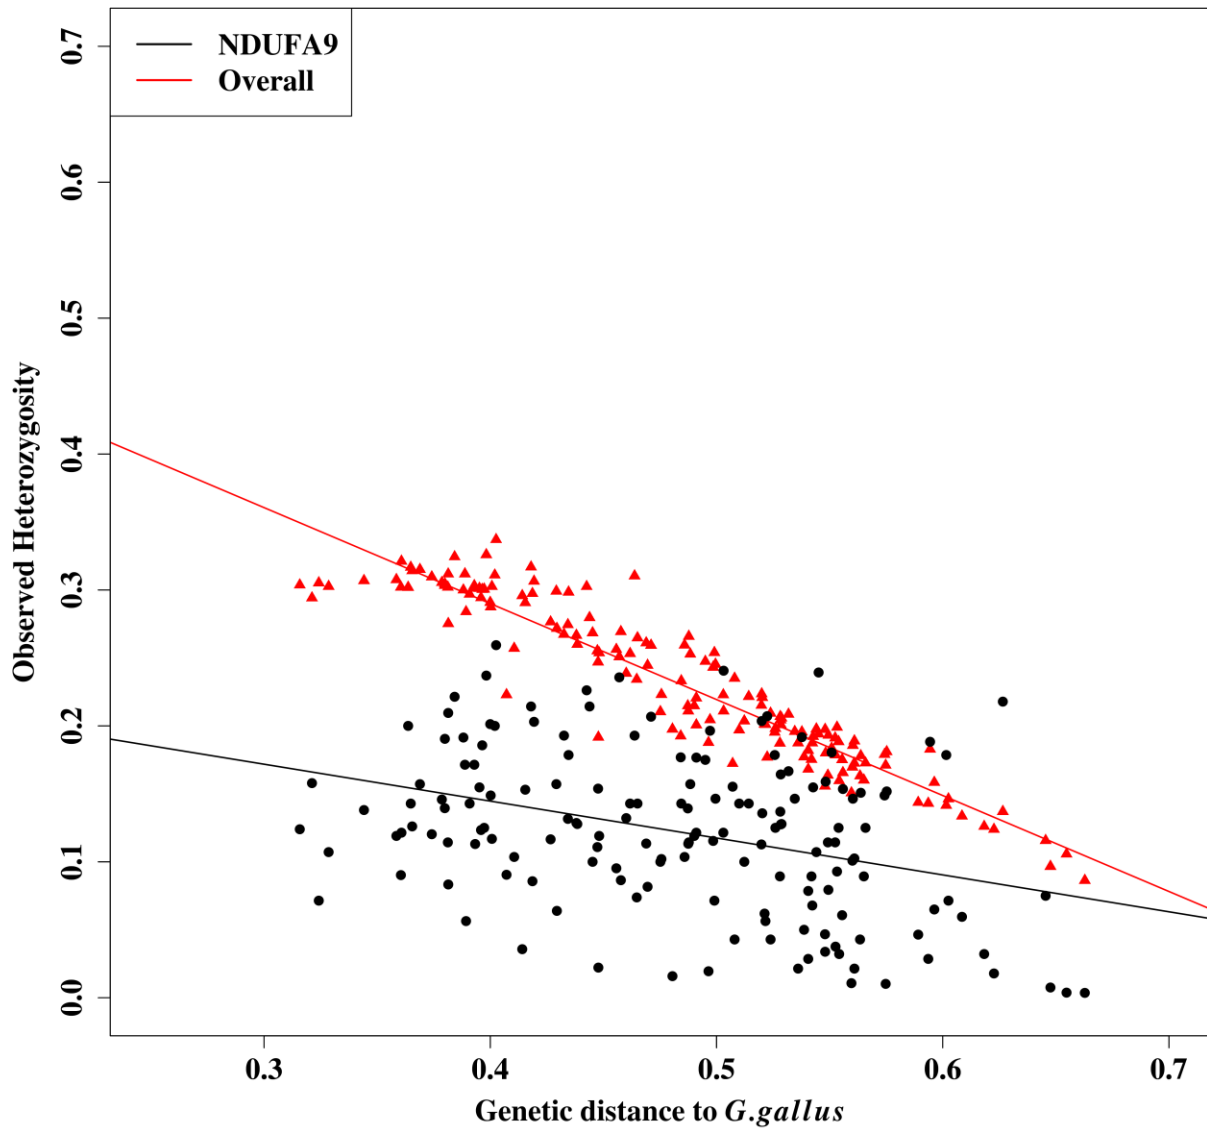

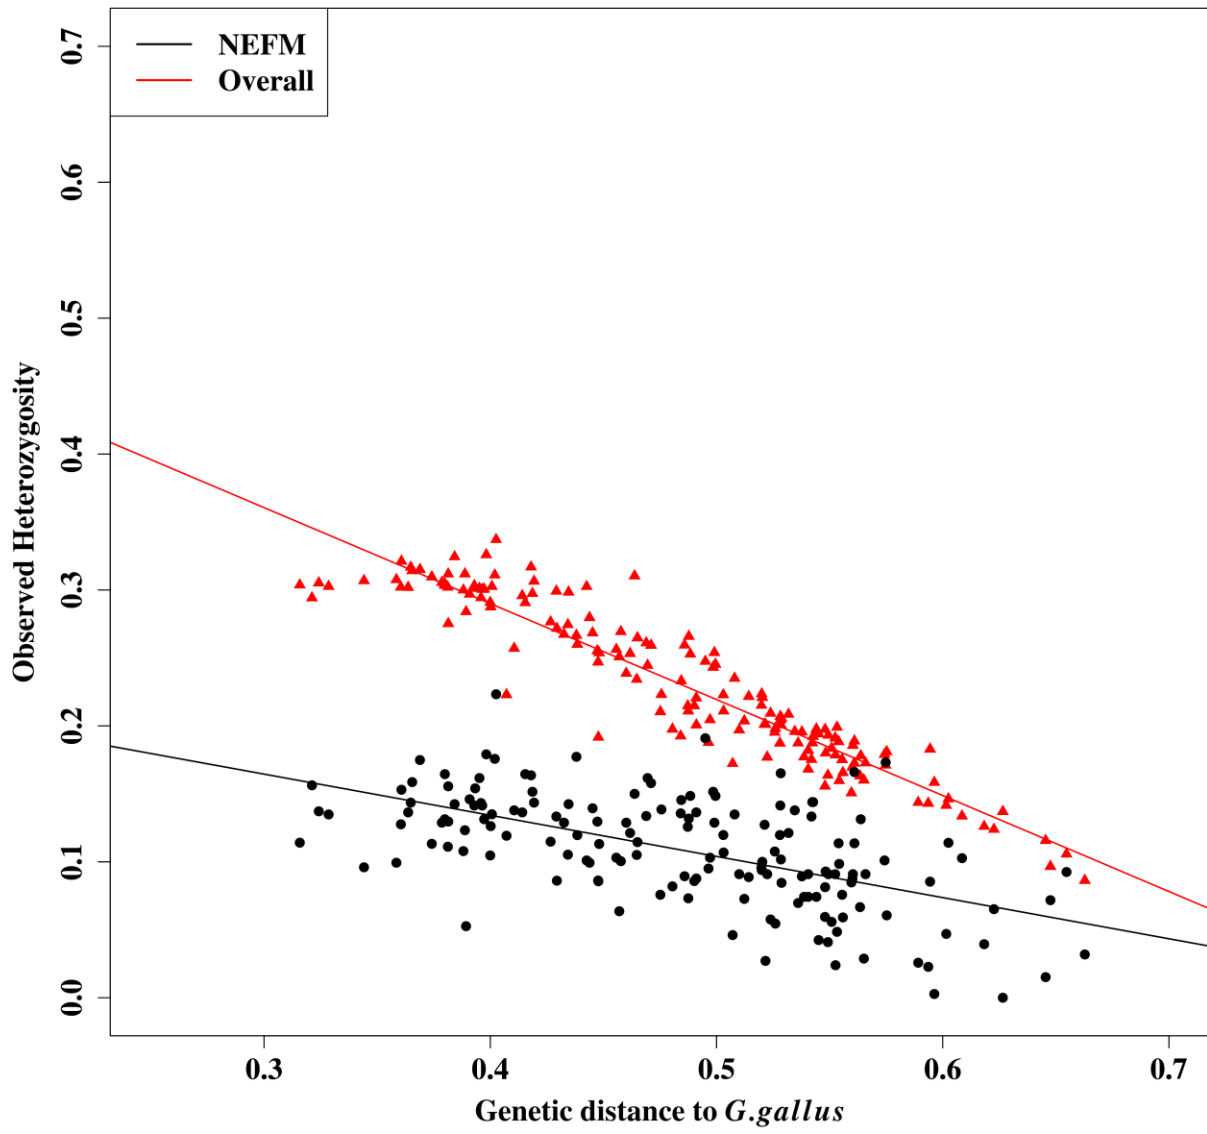

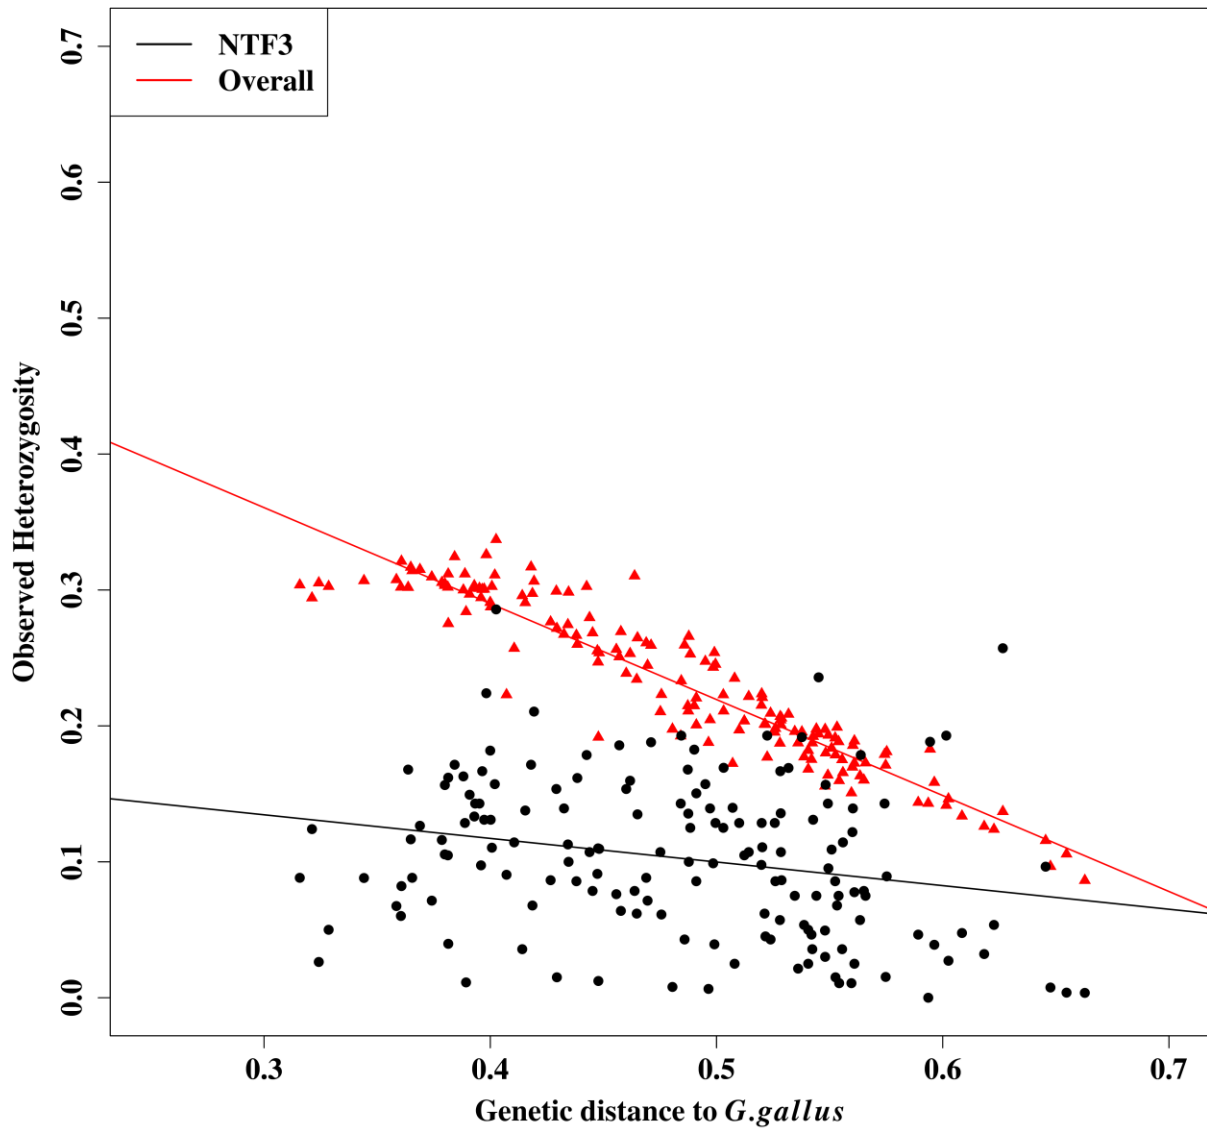

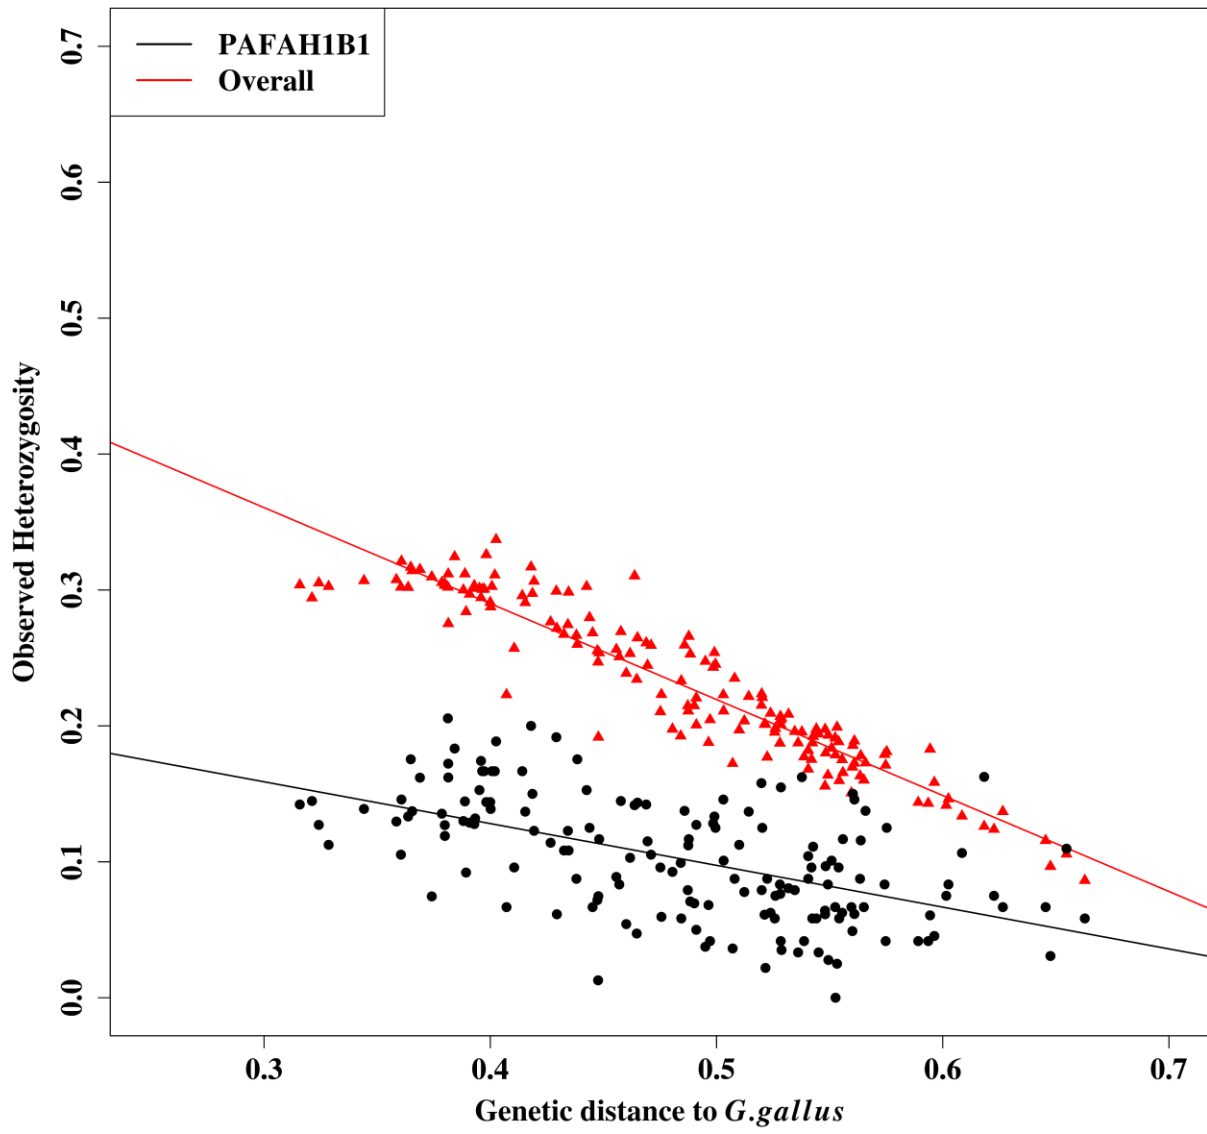

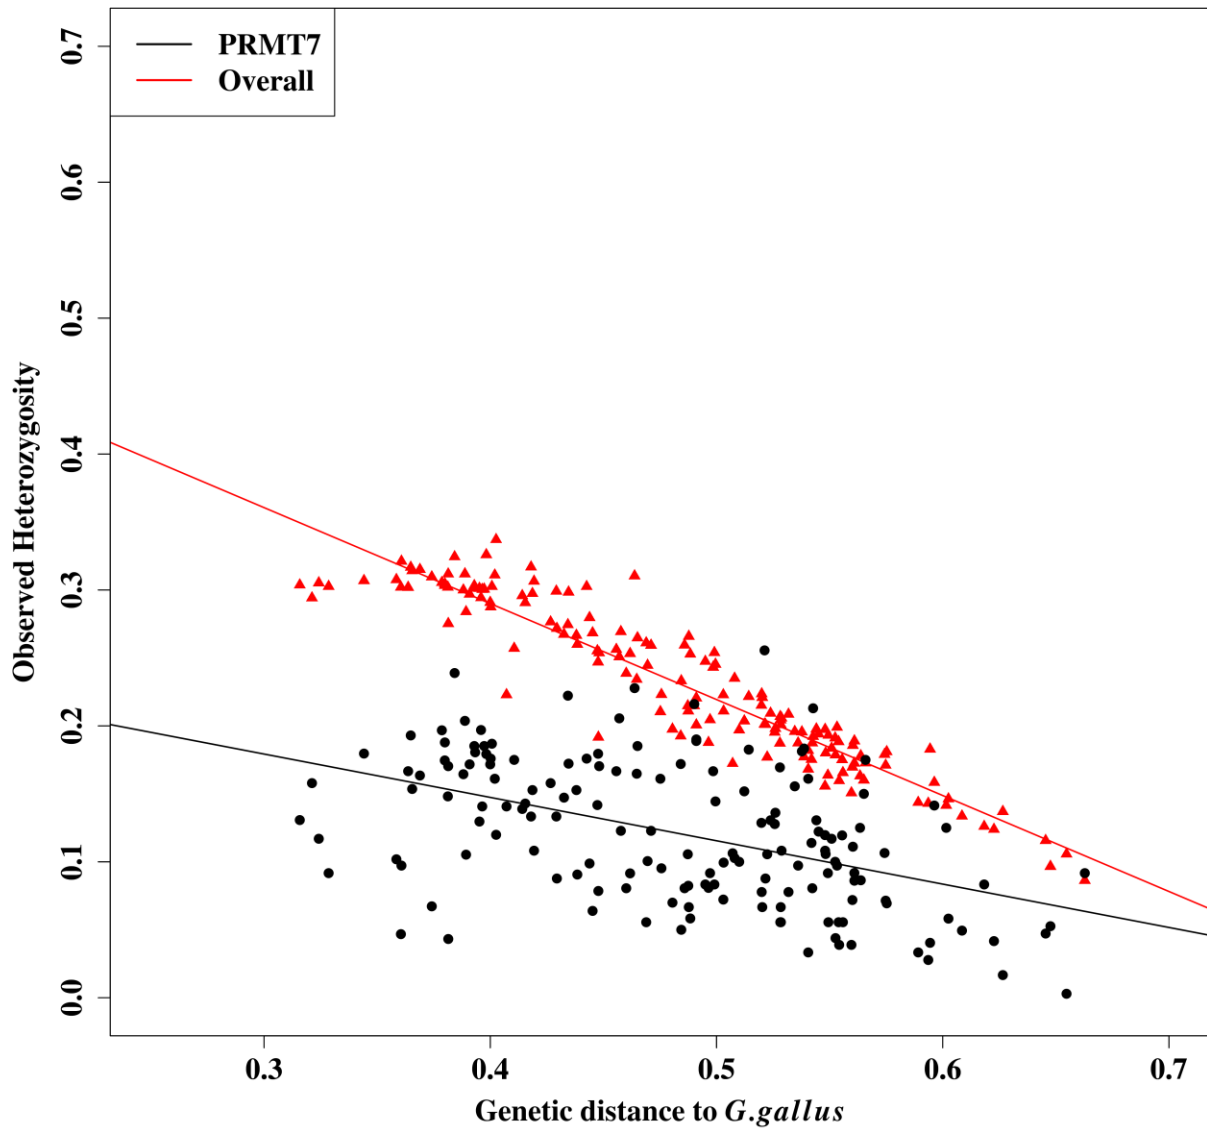

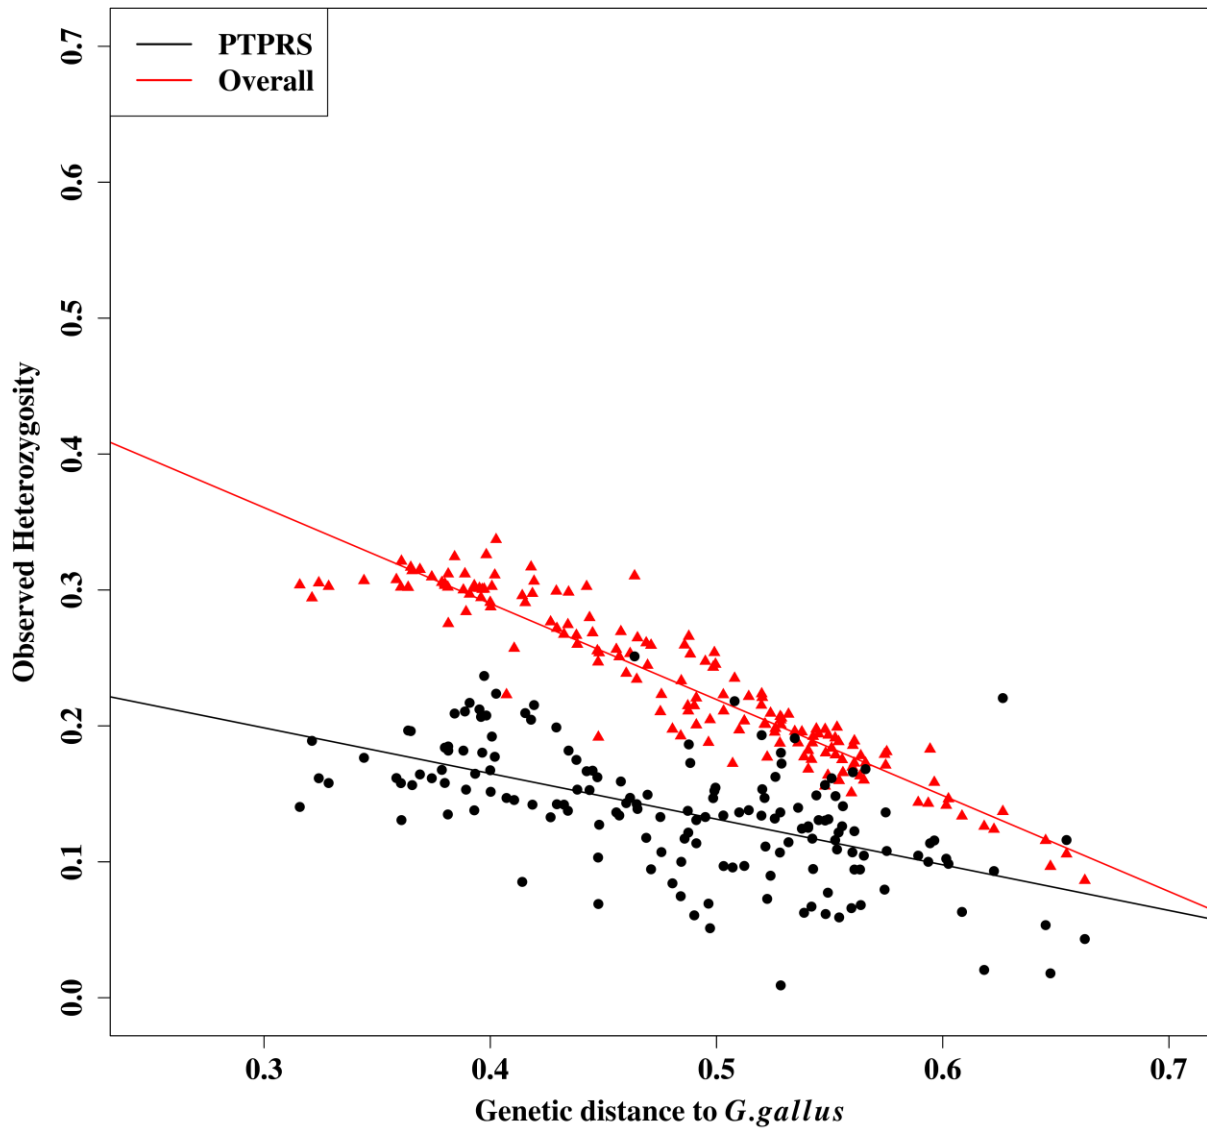

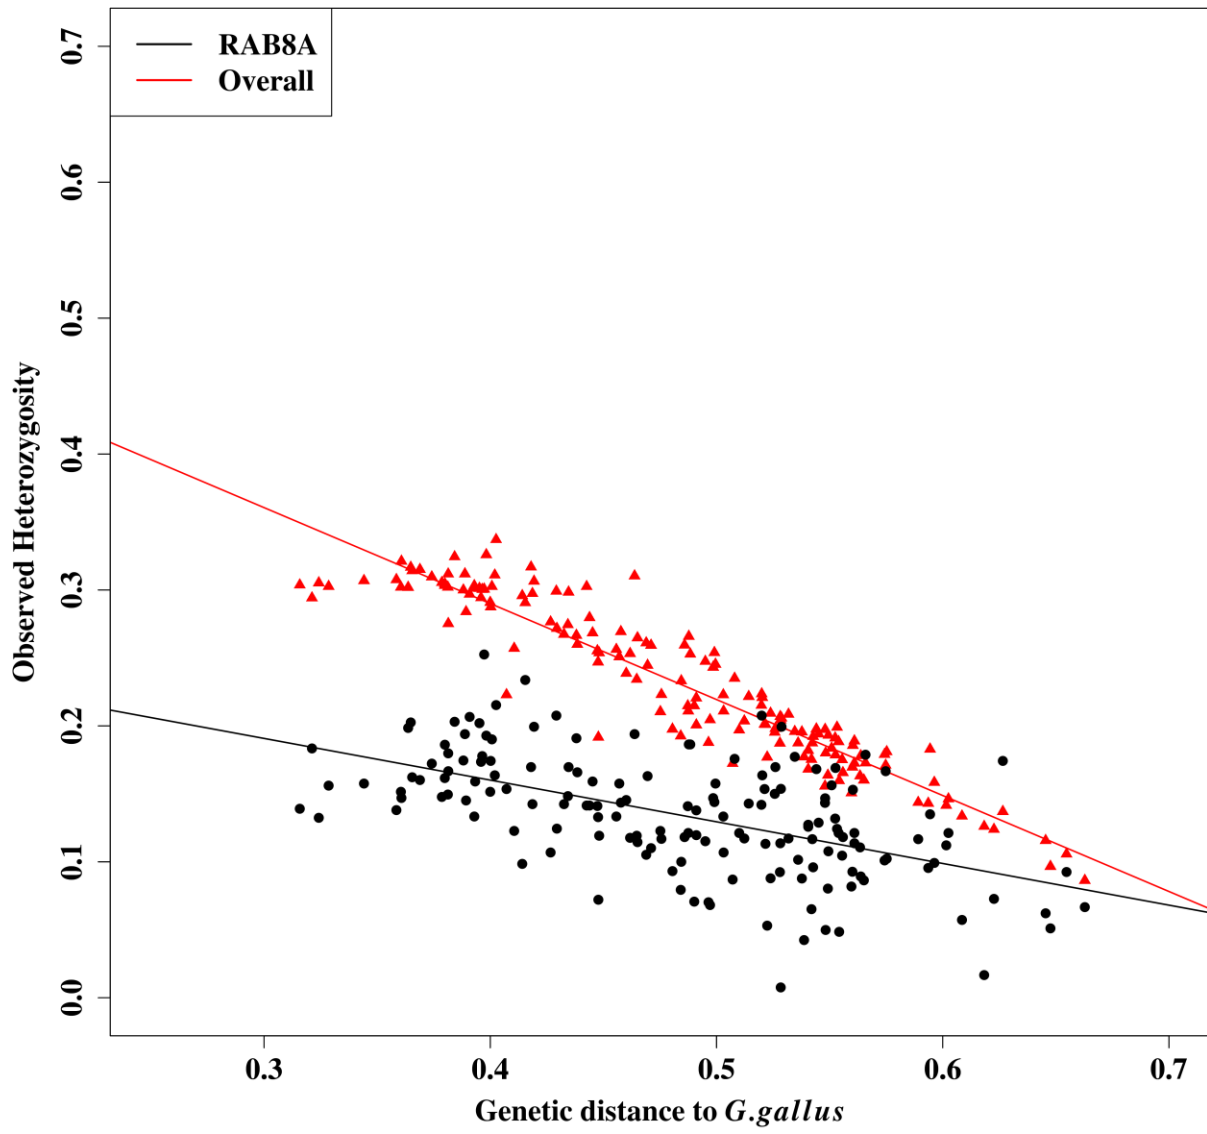



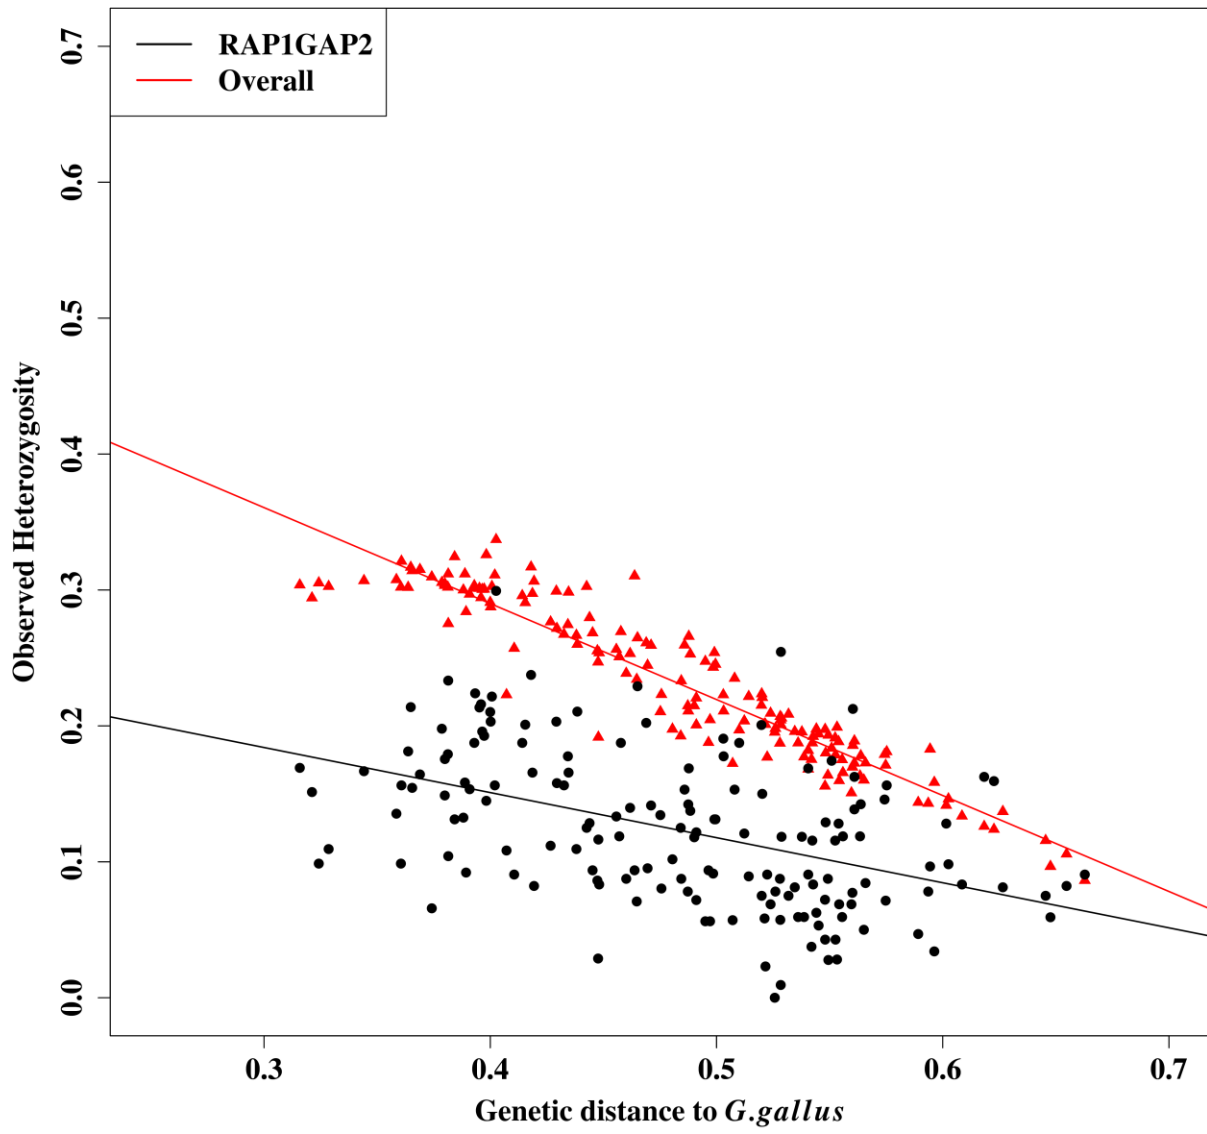

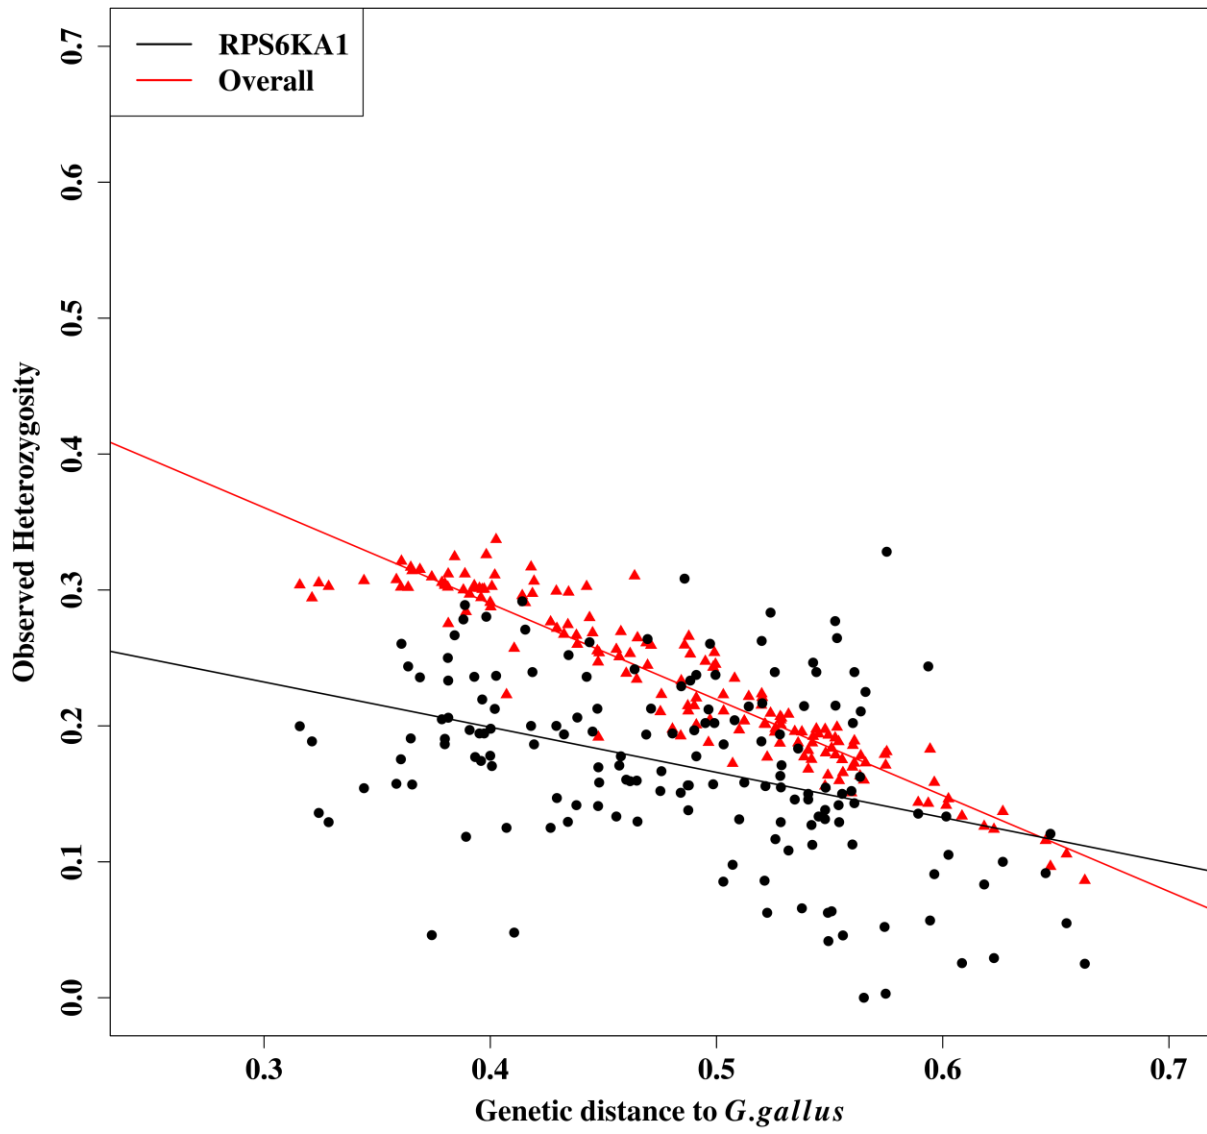

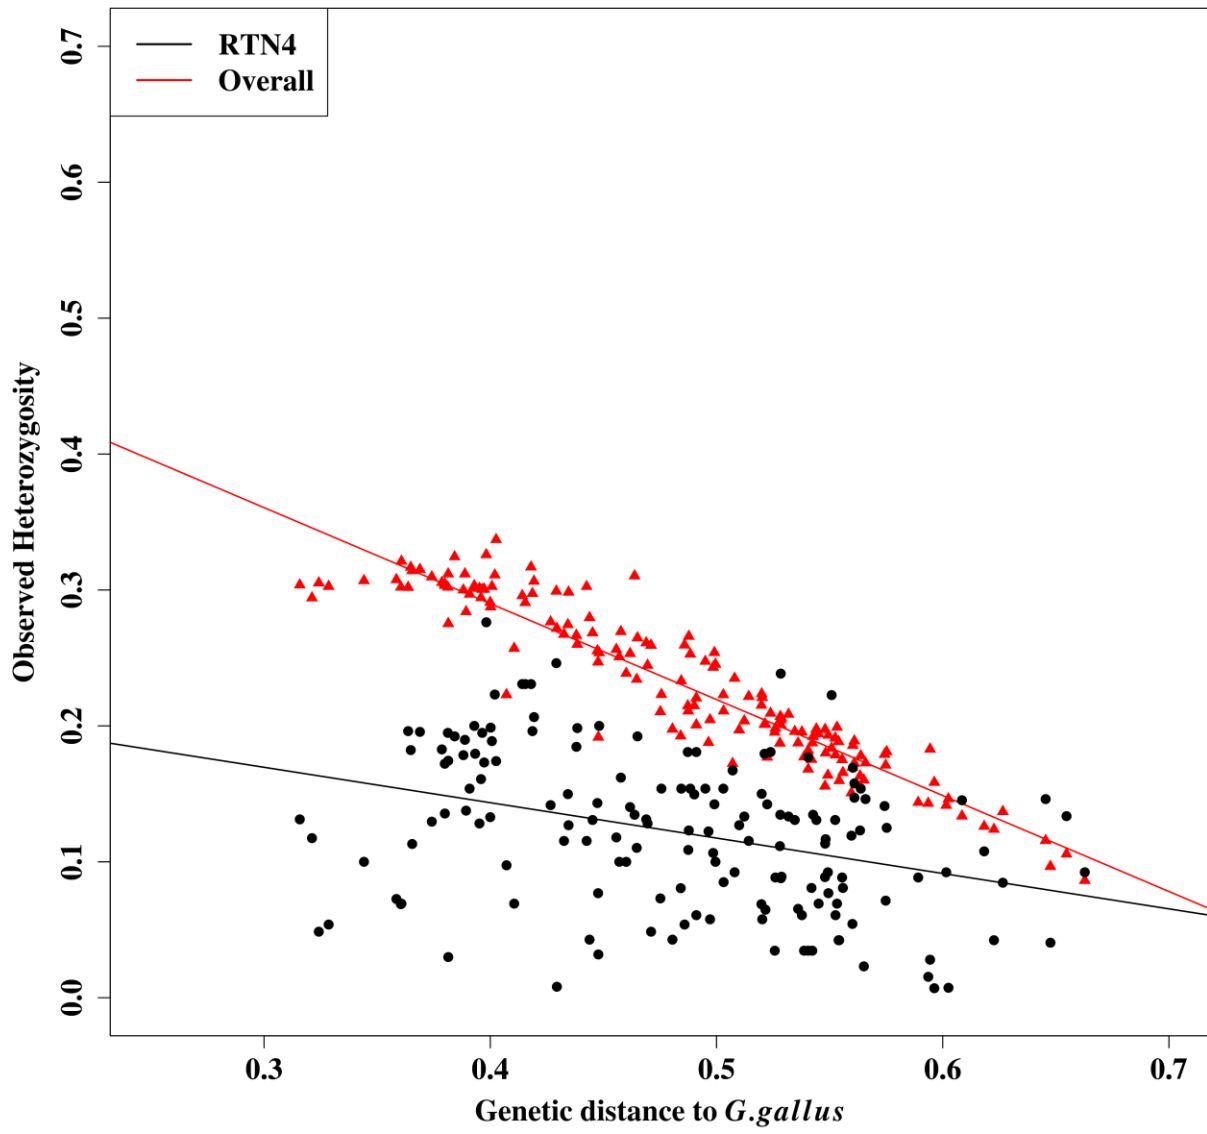

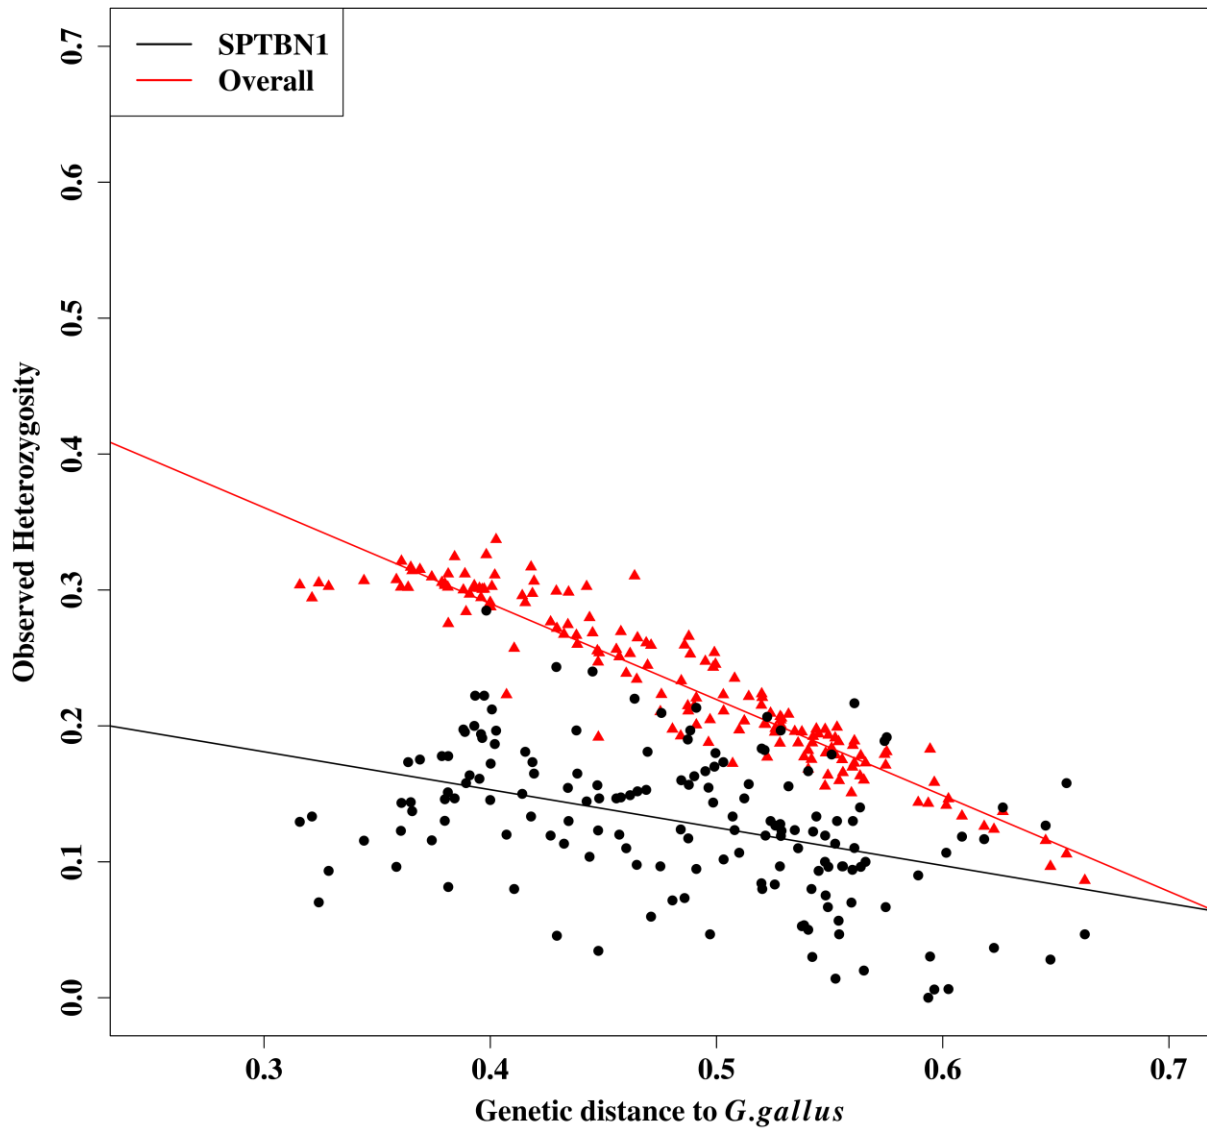

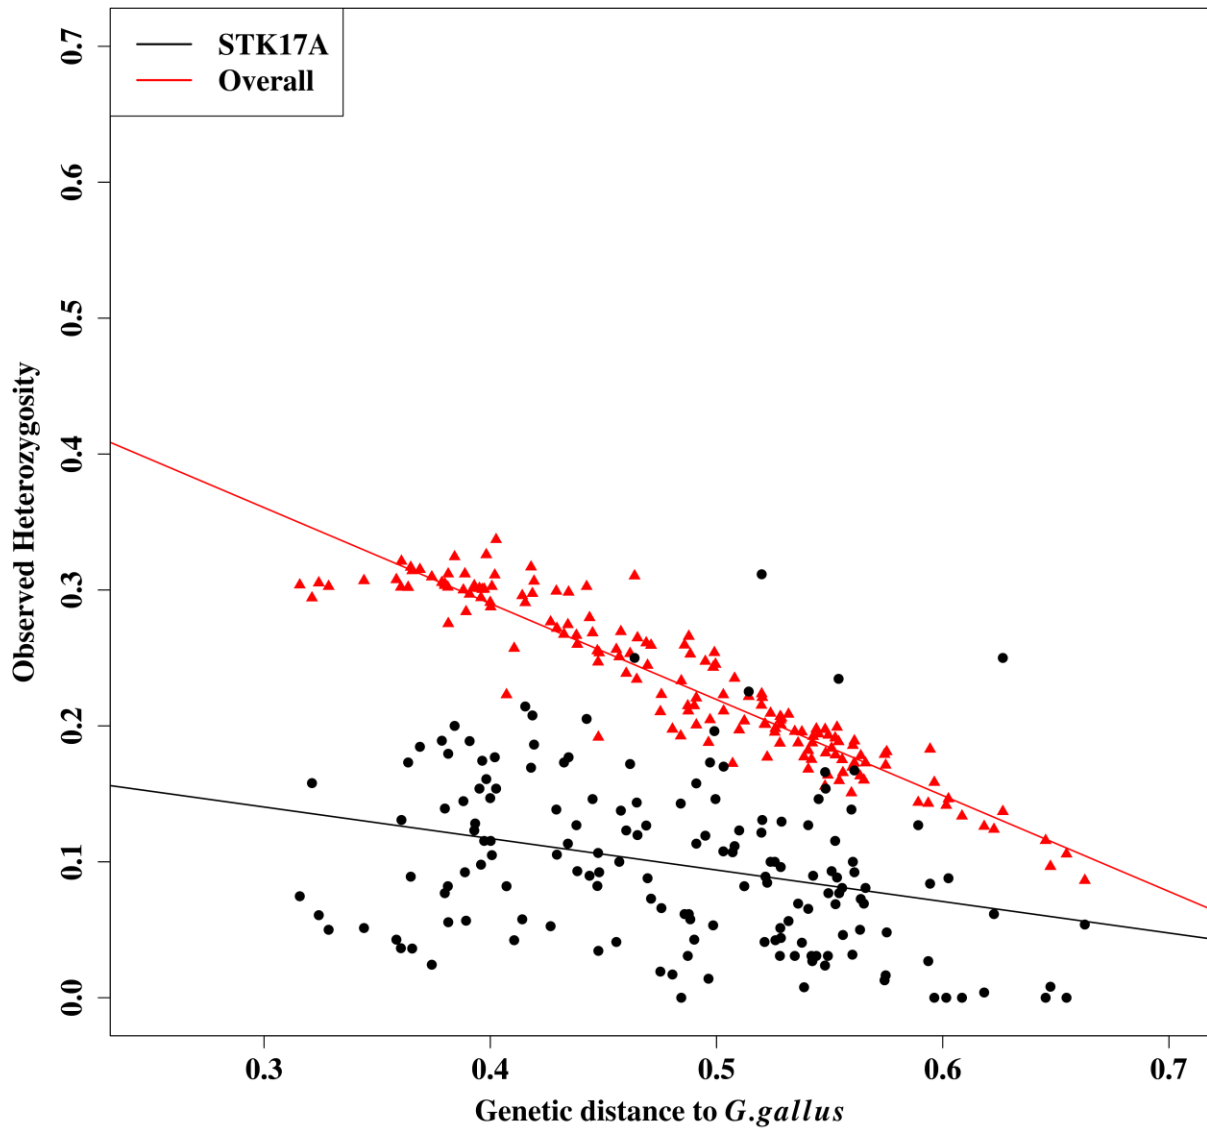

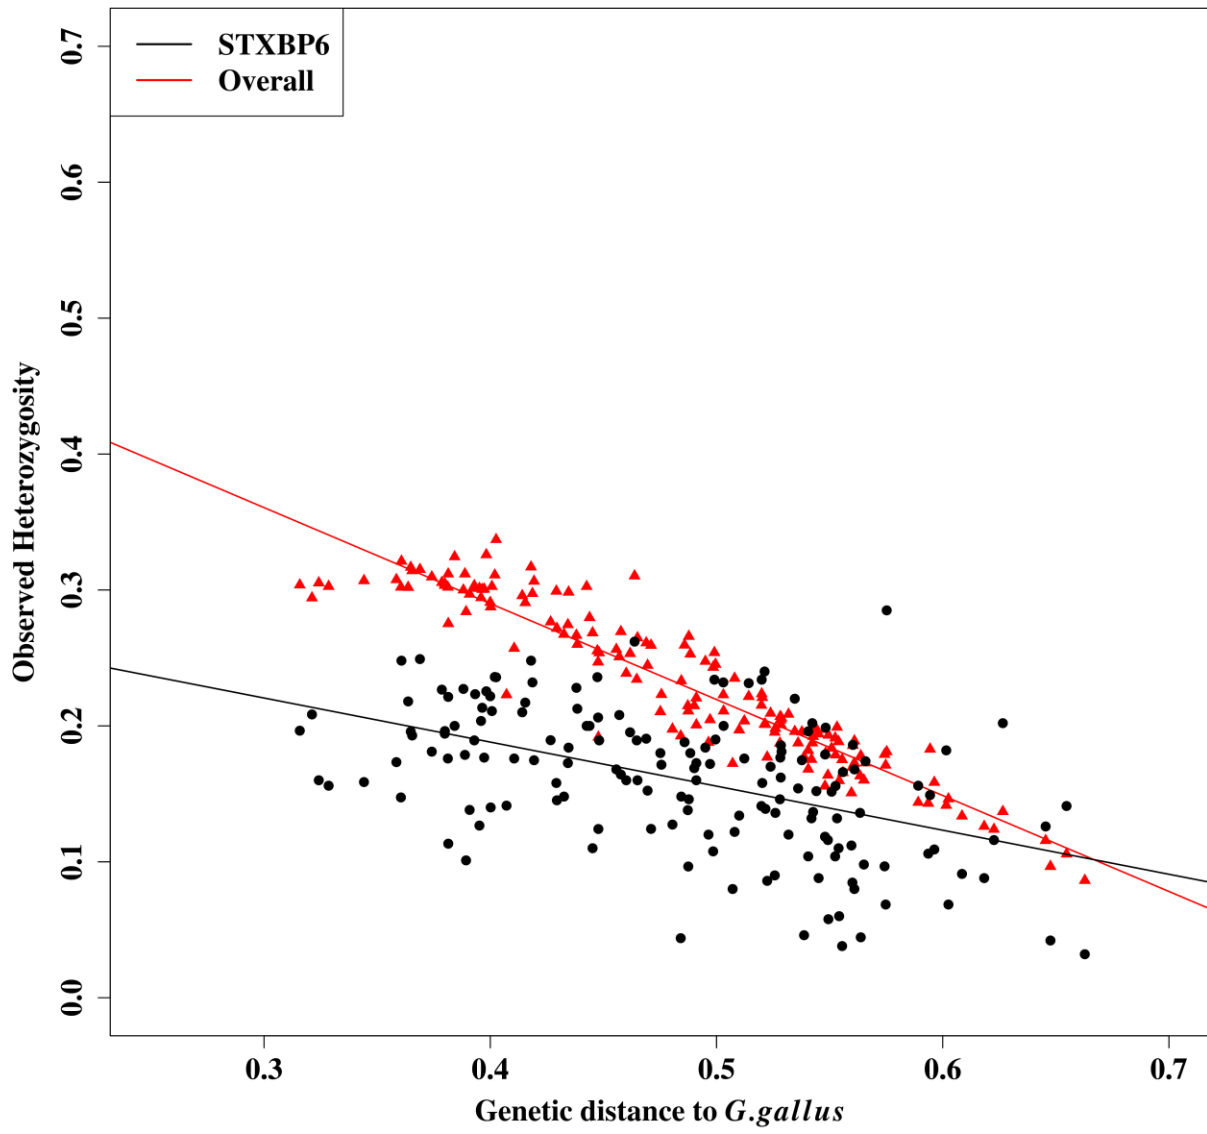

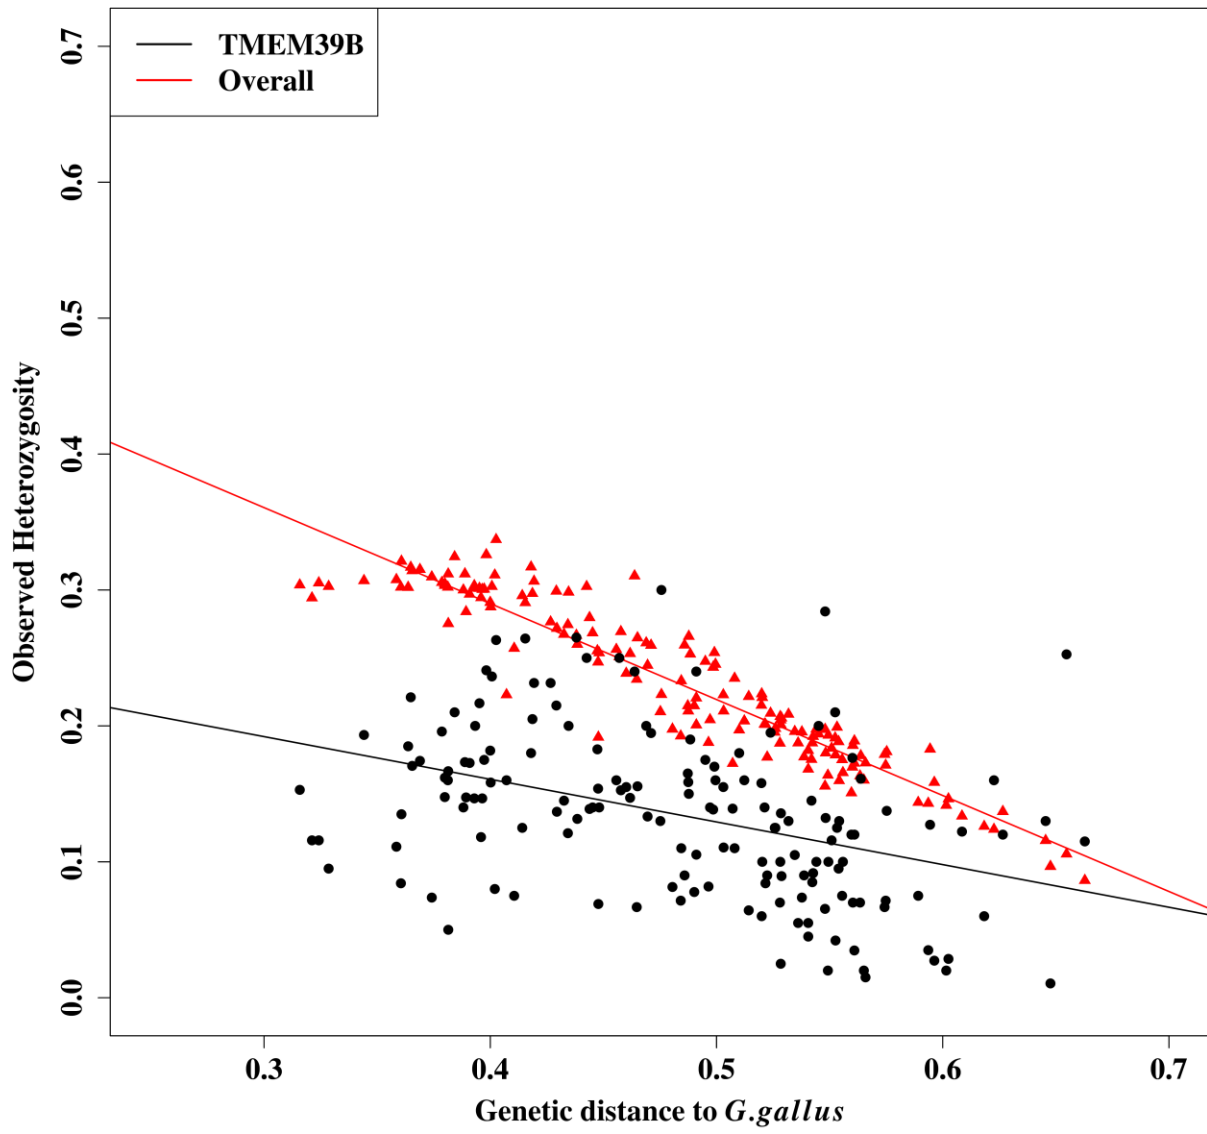

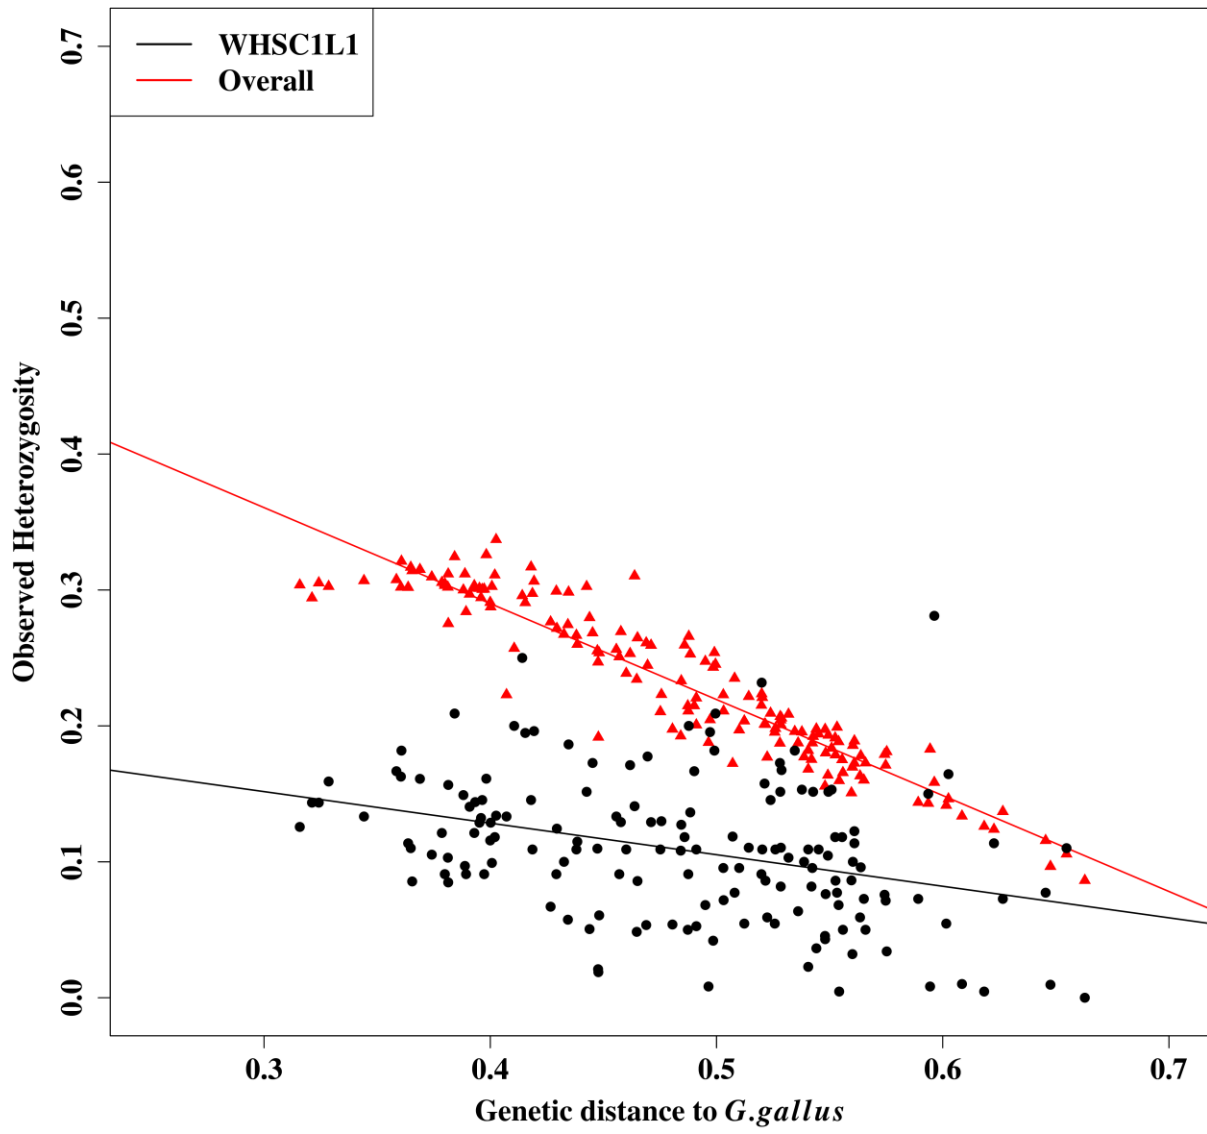

Supplement: 12711_2021_628_MOESM5_ESM.pdf [file 12711_2021_628_MOESM5_ESM.pdf]
