# Supplementary material for: Genetic diversity in global chicken breeds in relation to their genetic distances to wild populations
Source: Genet Sel Evol. 2021 Apr 14;53:36. doi: 10.1186/s12711-021-00628-z (PMC8048360; doi:10.1186/s12711-021-00628-z)
Supplement: Supplementary file 1 — Additional file 1: Table S1. Categories of chicken breeds. Table S2. Relationship between observed heterozygosity and genetic distance to Gallus gallus for different groups of populations. Table S4. List and functions of the genes in the top and lowest 5% slope ranges. [file 12711_2021_628_MOESM1_ESM.pdf]

**Table S1 Categories of chicken breeds**

| Category      | Full name                                   | Number of breeds | Number of individuals |
|---------------|---------------------------------------------|------------------|-----------------------|
| Wild          | Wild type chicken                           | 2                | 38                    |
| DE_Europe_Ban | European bantams sampled in Germany         | 8                | 156                   |
| DE_Europe     | European breeds sampled in Germany          | 35               | 660                   |
| DE_Asia_Ban   | Asian bantams sampled in Germany            | 8                | 177                   |
| DE_Asia       | Asian breeds sampled in Germany             | 28               | 531                   |
| Europe_local  | European local breeds sampled across Europe | 25               | 443                   |
| Asia_local    | Asian local breeds sampled across Asia      | 30               | 509                   |
| South_America | South American breeds                       | 4                | 78                    |
| Africa        | African breeds                              | 22               | 410                   |
| Overall       |                                             | <b>162</b>       | <b>3002</b>           |

Source: Malomane *et al.* [1]

**Table S2 Relationship between observed heterozygosity and genetic distance to *Gallus gallus* for different groups of populations.**

|               | <b>R<sup>2</sup></b> | <b>Slope</b> | <b>SE of slope</b> |
|---------------|----------------------|--------------|--------------------|
| Asia_local    | 0.343                | -0.187       | 0.049              |
| DE_Asia_all   | 0.728                | -0.543       | 0.057              |
| Europe_local  | 0.754                | -0.706       | 0.084              |
| DE_Europe_all | 0.898                | -0.714       | 0.038              |
| Africa        | 0.744                | -0.616       | 0.081              |

DE\_Asia\_all and DE\_Europe\_all consists of all fancy breeds including the bantamised breeds of Asian and European background, respectively. SE – standard error.

**Table S4 List and functions of the genes in the top and lowest 5% slope ranges**

| Gene                | Slope  | R <sup>2</sup> | SNP no | Function                                                                                                                                                                                                                                                                                                                                                                                                                                                                    |
|---------------------|--------|----------------|--------|-----------------------------------------------------------------------------------------------------------------------------------------------------------------------------------------------------------------------------------------------------------------------------------------------------------------------------------------------------------------------------------------------------------------------------------------------------------------------------|
| <b>Top 5% genes</b> |        |                |        |                                                                                                                                                                                                                                                                                                                                                                                                                                                                             |
| SLC25A6             | -1.185 | 0.607          | 14     | Transmembrane transport, mitochondrial inner membrane, integral component of membrane.<br>Calcium signaling pathway.                                                                                                                                                                                                                                                                                                                                                        |
| PLCXD1              | -1.098 | 0.543          | 10     | Lipid metabolic process.                                                                                                                                                                                                                                                                                                                                                                                                                                                    |
| CCM2                | -1.095 | 0.550          | 10     | Vasculogenesis, endothelial cell development, multicellular organism growth, cell-cell junction organization, inner ear development, venous blood vessel morphogenesis, pericardium development, blood vessel endothelial cell differentiation, endothelial tube morphogenesis.                                                                                                                                                                                             |
| FAM46D              | -1.078 | 0.538          | 11     | Domain of unknown function DUF1693.                                                                                                                                                                                                                                                                                                                                                                                                                                         |
| SCGN                | -1.073 | 0.547          | 10     | Regulation of cytosolic calcium ion concentration.                                                                                                                                                                                                                                                                                                                                                                                                                          |
| MIR33               | -1.068 | 0.577          | 21     | Lipid metabolism and energy homeostasis [2].                                                                                                                                                                                                                                                                                                                                                                                                                                |
| MAEL                | -1.057 | 0.444          | 11     | Negative regulation of transcription from RNA polymerase II promoter, cell morphogenesis, synapsis, male meiosis, spermatogenesis, intrinsic apoptotic signaling pathway in response to DNA damage, fertilization, gene silencing by RNA, piRNA metabolic process, DNA methylation involved in gamete generation, negative regulation of apoptotic process, negative regulation of transcription, DNA-templated, regulation of organ growth, sequence-specific DNA binding. |
| IPCEF1              | -1.042 | 0.459          | 10     | Pleckstrin homology domain, Pleckstrin homology-like domain.                                                                                                                                                                                                                                                                                                                                                                                                                |
| PTGFRN              | -1.038 | 0.517          | 14     | Immunoglobulin subtype, immunoglobulin-like domain, immunoglobulin V-set, immunoglobulin-like fold, lipid particle organization.                                                                                                                                                                                                                                                                                                                                            |
| GTF3C1              | -1.038 | 0.536          | 17     | Transcription factor TFIIC complex, nucleolus, membrane, intracellular ribonucleoprotein complex.                                                                                                                                                                                                                                                                                                                                                                           |
| SLMO1               | -1.030 | 0.575          | 29     | Positive regulation of protein targeting to mitochondrion.                                                                                                                                                                                                                                                                                                                                                                                                                  |
| P2RY8               | -1.026 | 0.607          | 22     | G-protein coupled receptor activity, thrombin receptor activity, G-protein coupled purinergic nucleotide receptor activity, blood coagulation, positive regulation of Rho protein signal transduction, G-protein coupled purinergic nucleotide receptor signaling pathway, positive regulation of cytosolic calcium ion concentration involved in phospholipase C-activating G-protein coupled signaling pathway, thrombin receptor signaling pathway.                      |
| TRAF3IP2            | -1.023 | 0.496          | 14     | B cell apoptotic process, positive regulation of defense response to virus by host, humoral immune response, positive regulation of I-kappaB kinase/NF-kappaB signaling, immunoglobulin secretion.                                                                                                                                                                                                                                                                          |
| ACP6                | -1.022 | 0.554          | 18     | Hematopoietic progenitor cell differentiation, acid phosphatase activity.                                                                                                                                                                                                                                                                                                                                                                                                   |
| GJA5                | -1.017 | 0.478          | 14     | Skeletal system development, angiogenesis, renal system process involved in regulation of systemic arterial blood pressure, outflow tract morphogenesis, cardiac conduction system development, mitral valve development, pulmonary valve formation, septum primum development,                                                                                                                                                                                             |

|         |        |       |    |                                                                                                                                                                                                                                                                                                                                                                                                                                                                                                                                                                                                                                                                                                                                                                                                                                                                                                                                                                                                                                                                                                                                                                                                             |
|---------|--------|-------|----|-------------------------------------------------------------------------------------------------------------------------------------------------------------------------------------------------------------------------------------------------------------------------------------------------------------------------------------------------------------------------------------------------------------------------------------------------------------------------------------------------------------------------------------------------------------------------------------------------------------------------------------------------------------------------------------------------------------------------------------------------------------------------------------------------------------------------------------------------------------------------------------------------------------------------------------------------------------------------------------------------------------------------------------------------------------------------------------------------------------------------------------------------------------------------------------------------------------|
|         |        |       |    | atrial ventricular junction remodeling, cell communication, gap junction assembly, embryonic limb morphogenesis, embryonic heart tube development, foramen ovale closure, regulation of vasodilation, artery morphogenesis, regulation of ventricular cardiac muscle cell membrane repolarization, regulation of atrial cardiac muscle cell membrane depolarization, regulation of ventricular cardiac muscle cell membrane depolarization, ventricular septum morphogenesis, atrial septum morphogenesis, ventricular cardiac muscle cell action potential, SA node cell action potential, bundle of His cell to Purkinje myocyte communication by electrical coupling, regulation of heart rate by cardiac conduction, regulation of AV node cell action potential, regulation of bundle of His cell action potential, regulation of Purkinje myocyte action potential, regulation of atrial cardiac muscle cell action potential, regulation of renin secretion into blood stream, regulation of membrane depolarization during cardiac muscle cell action potential, gap junction hemi-channel activity, gap junction channel activity involved in AV node cell-bundle of His cell electrical coupling. |
| C1GALT1 | -1.015 | 0.515 | 17 | Angiogenesis, kidney development, O-glycan processing, core 1, intestinal epithelial cell development.                                                                                                                                                                                                                                                                                                                                                                                                                                                                                                                                                                                                                                                                                                                                                                                                                                                                                                                                                                                                                                                                                                      |
| HCLS1   | -1.013 | 0.531 | 18 | Tight junction, negative regulation of transcription from RNA polymerase II promoter, positive regulation of cell proliferation, response to hormone, positive regulation of phosphatidylinositol 3-kinase signaling, actin filament polymerization, erythrocyte differentiation, regulation of actin filament polymerization, positive regulation of granulocyte differentiation, positive regulation of peptidyl-serine phosphorylation, positive regulation of tyrosine phosphorylation of STAT protein, positive regulation of transcription factor import into nucleus, positive regulation of macrophage differentiation, positive regulation of transcription from RNA polymerase II promoter, positive regulation of protein kinase B signaling, cellular response to cytokine stimulus, negative regulation of leukocyte apoptotic process.                                                                                                                                                                                                                                                                                                                                                        |
| NHSL1   | -1.011 | 0.534 | 10 | Not well known.                                                                                                                                                                                                                                                                                                                                                                                                                                                                                                                                                                                                                                                                                                                                                                                                                                                                                                                                                                                                                                                                                                                                                                                             |
| XRCC6   | -1.010 | 0.589 | 24 | Non-homologous end-joining, telomere maintenance, double-strand break repair via nonhomologous end joining, DNA recombination, transcription, DNA-templated, DNA duplex unwinding, negative regulation of transcription, DNA-templated, positive regulation of transcription from RNA polymerase II promoter, regulation of smooth muscle cell proliferation, protein heterotetramerization, cellular response to gamma radiation, cellular response to X-ray, double-strand break repair via classical nonhomologous end joining, damaged DNA binding, double-stranded DNA binding, double-stranded telomeric DNA binding, ATP-dependent DNA helicase activity, ATP binding, telomeric DNA binding, transcription regulatory region DNA binding, poly(A) RNA binding, macromolecular complex binding, 5'-                                                                                                                                                                                                                                                                                                                                                                                                  |

|                        |        |       |    |                                                                                                                                                                                                                                                                                                                                                                                                                                                                                                             |
|------------------------|--------|-------|----|-------------------------------------------------------------------------------------------------------------------------------------------------------------------------------------------------------------------------------------------------------------------------------------------------------------------------------------------------------------------------------------------------------------------------------------------------------------------------------------------------------------|
|                        |        |       |    | deoxyribose-5-phosphate lyase activity.                                                                                                                                                                                                                                                                                                                                                                                                                                                                     |
| SLC22A15               | -1.009 | 0.508 | 12 | Substrate-specific transmembrane transporter activity, integral component of membrane.                                                                                                                                                                                                                                                                                                                                                                                                                      |
| UCHL5                  | -1.005 | 0.591 | 17 | Ubiquitin-dependent protein catabolic process, protein deubiquitination, Ino80 complex.                                                                                                                                                                                                                                                                                                                                                                                                                     |
| LOC100858381           | -1.004 | 0.446 | 10 | Not well known.                                                                                                                                                                                                                                                                                                                                                                                                                                                                                             |
| LSM6                   | -1.003 | 0.544 | 11 | mRNA splicing, via spliceosome, maturation of SSU-rRNA.<br>RNA degradation and spliceosome pathways.                                                                                                                                                                                                                                                                                                                                                                                                        |
| TERF1                  | -1.002 | 0.632 | 44 | Double-stranded telomeric DNA binding, telomeric DNA binding, telomere maintenance, telomeric loop formation, meiotic telomere clustering.                                                                                                                                                                                                                                                                                                                                                                  |
| MIR1755                | -1.001 | 0.492 | 10 | Not well known.                                                                                                                                                                                                                                                                                                                                                                                                                                                                                             |
| PPPDE1                 | -0.999 | 0.536 | 11 | Not well known.                                                                                                                                                                                                                                                                                                                                                                                                                                                                                             |
| PDSS2                  | -0.998 | 0.510 | 25 | Protein deubiquitination.                                                                                                                                                                                                                                                                                                                                                                                                                                                                                   |
| MON2                   | -0.996 | 0.507 | 11 | Vesicle-mediated transport.                                                                                                                                                                                                                                                                                                                                                                                                                                                                                 |
| WWC2                   | -0.995 | 0.601 | 17 | Negative regulation of transcription from RNA polymerase II promoter, negative regulation of hippo signaling, negative regulation of organ growth.                                                                                                                                                                                                                                                                                                                                                          |
| RPL7                   | -0.994 | 0.543 | 16 | Ribosome, maturation of LSU-rRNA from tricistronic rRNA transcript (SSU-rRNA, 5.8S rRNA, LSU-rRNA), cytoplasmic translation, rRNA processing, ribosomal large subunit biogenesis, DNA binding, mRNA binding, structural constituent of ribosome, protein homodimerization activity, poly(A) RNA binding.                                                                                                                                                                                                    |
| TBC1D2B                | -0.990 | 0.492 | 16 | GTPase activator activity, Rab GTPase binding, intracellular protein transport, regulation of vesicle fusion, activation of GTPase activity.                                                                                                                                                                                                                                                                                                                                                                |
| LOC420419              | -0.989 | 0.562 | 28 | MAPK signaling pathway, GnRH signaling pathway.                                                                                                                                                                                                                                                                                                                                                                                                                                                             |
| <b>Lowest 5% genes</b> |        |       |    |                                                                                                                                                                                                                                                                                                                                                                                                                                                                                                             |
| MTA3                   | -0.342 | 0.122 | 19 | Chromatin binding, sequence-specific DNA binding.                                                                                                                                                                                                                                                                                                                                                                                                                                                           |
| PTPRS                  | -0.336 | 0.333 | 44 | Spinal cord development, cerebellum development, hippocampus development, cerebral cortex development, corpus callosum development, extracellular matrix organization, establishment of endothelial intestinal barrier.                                                                                                                                                                                                                                                                                     |
| CKMT1A                 | -0.332 | 0.282 | 15 | Phosphorylation, arginine and proline metabolism, metabolic pathways.                                                                                                                                                                                                                                                                                                                                                                                                                                       |
| RAP1GAP2               | -0.332 | 0.215 | 16 | GTPase activator activity, regulation of cell size, negative regulation of neuron projection development, positive regulation of GTPase activity, regulation of small GTPase mediated signal transduction.                                                                                                                                                                                                                                                                                                  |
| RPS6KA1                | -0.332 | 0.155 | 24 | Magnesium ion binding, protein serine/threonine kinase activity, protein serine/threonine/tyrosine kinase activity, ATP binding, cysteine-type endopeptidase inhibitor activity involved in apoptotic process, protein phosphorylation, apoptotic process, intracellular signal transduction, negative regulation of cysteine-type endopeptidase activity involved in apoptotic process, positive regulation of transcription from RNA polymerase II promoter, positive regulation of hepatic stellate cell |

|            |        |       |    |                                                                                                                                                                                                                                                                                                                                                                                                                                                                                                                                                                                                                                                                                                                                                                                                                                                                                                                                                                                                                                                                                                                                                                                                                                                                                                                                                                                                                                                                                                                                                                                                                                                                                                                                                                                                                                                                                                                                                                |
|------------|--------|-------|----|----------------------------------------------------------------------------------------------------------------------------------------------------------------------------------------------------------------------------------------------------------------------------------------------------------------------------------------------------------------------------------------------------------------------------------------------------------------------------------------------------------------------------------------------------------------------------------------------------------------------------------------------------------------------------------------------------------------------------------------------------------------------------------------------------------------------------------------------------------------------------------------------------------------------------------------------------------------------------------------------------------------------------------------------------------------------------------------------------------------------------------------------------------------------------------------------------------------------------------------------------------------------------------------------------------------------------------------------------------------------------------------------------------------------------------------------------------------------------------------------------------------------------------------------------------------------------------------------------------------------------------------------------------------------------------------------------------------------------------------------------------------------------------------------------------------------------------------------------------------------------------------------------------------------------------------------------------------|
|            |        |       |    | activation.                                                                                                                                                                                                                                                                                                                                                                                                                                                                                                                                                                                                                                                                                                                                                                                                                                                                                                                                                                                                                                                                                                                                                                                                                                                                                                                                                                                                                                                                                                                                                                                                                                                                                                                                                                                                                                                                                                                                                    |
| KIF1B      | -0.325 | 0.132 | 16 | Microtubule-based movement, neuron-neuron synaptic transmission, neuromuscular synaptic transmission, anterograde axonal transport, cytoskeleton-dependent intracellular transport, mitochondrion transport along microtubule.                                                                                                                                                                                                                                                                                                                                                                                                                                                                                                                                                                                                                                                                                                                                                                                                                                                                                                                                                                                                                                                                                                                                                                                                                                                                                                                                                                                                                                                                                                                                                                                                                                                                                                                                 |
| STXBP6     | -0.324 | 0.242 | 25 | Exocytosis, Golgi to plasma membrane transport, regulation of SNARE complex assembly, exocyst localization.                                                                                                                                                                                                                                                                                                                                                                                                                                                                                                                                                                                                                                                                                                                                                                                                                                                                                                                                                                                                                                                                                                                                                                                                                                                                                                                                                                                                                                                                                                                                                                                                                                                                                                                                                                                                                                                    |
| PRMT7      | -0.319 | 0.231 | 18 | Spliceosomal snRNP assembly, regulation of gene expression, DNA-templated, regulation of transcription, cell differentiation, DNA methylation involved in gamete generation, histone H4-R3 methylation.                                                                                                                                                                                                                                                                                                                                                                                                                                                                                                                                                                                                                                                                                                                                                                                                                                                                                                                                                                                                                                                                                                                                                                                                                                                                                                                                                                                                                                                                                                                                                                                                                                                                                                                                                        |
| TMEM39B    | -0.314 | 0.163 | 10 | Not well known                                                                                                                                                                                                                                                                                                                                                                                                                                                                                                                                                                                                                                                                                                                                                                                                                                                                                                                                                                                                                                                                                                                                                                                                                                                                                                                                                                                                                                                                                                                                                                                                                                                                                                                                                                                                                                                                                                                                                 |
| C20H20ORF4 | -0.313 | 0.183 | 15 | Not well known.                                                                                                                                                                                                                                                                                                                                                                                                                                                                                                                                                                                                                                                                                                                                                                                                                                                                                                                                                                                                                                                                                                                                                                                                                                                                                                                                                                                                                                                                                                                                                                                                                                                                                                                                                                                                                                                                                                                                                |
| FGFR1      | -0.311 | 0.268 | 28 | Negative regulation of transcription from RNA polymerase II promoter, angiogenesis, ureteric bud development, organ induction, positive regulation of mesenchymal cell proliferation, chondrocyte differentiation, epicardial cell to mesenchymal cell transition, vacuolar phosphate transport, sensory perception of sound, positive regulation of cell proliferation, fibroblast growth factor receptor signaling pathway, positive regulation of phospholipase C activity, positive regulation of neuron projection development, peptidyl-tyrosine phosphorylation, ventricular zone neuroblast division, embryonic limb morphogenesis, midbrain development, fibroblast growth factor receptor signaling pathway involved in orbitofrontal cortex development, inner ear morphogenesis, outer ear morphogenesis, middle ear morphogenesis, positive regulation of MAP kinase activity, positive regulation of cell cycle, positive regulation of transcription, DNA-templated, protein autophosphorylation, paraxial mesoderm development, regulation of lateral mesodermal cell fate specification, cell maturation, mesenchymal cell differentiation, positive regulation of cardiac muscle cell proliferation, auditory receptor cell development, branching involved in salivary gland morphogenesis, lung-associated mesenchyme development, regulation of branching involved in salivary gland morphogenesis by mesenchymal-epithelial signaling, vitamin D3 metabolic process, positive regulation of MAPKKK cascade by fibroblast growth factor receptor signaling pathway, negative regulation of fibroblast growth factor production, positive regulation of endothelial cell chemotaxis to fibroblast growth factor, positive regulation of parathyroid hormone secretion, regulation of extrinsic apoptotic signaling pathway in absence of ligand. MAPK signaling pathway, adherens junction, and regulation of actin cytoskeleton pathways. |
| PAFAH1B1   | -0.307 | 0.299 | 12 | Establishment of mitotic spindle orientation, ameboidal-type cell migration, acrosome assembly, neuron migration, positive regulation of cytokine-mediated signaling pathway, mitotic nuclear division, nuclear migration,                                                                                                                                                                                                                                                                                                                                                                                                                                                                                                                                                                                                                                                                                                                                                                                                                                                                                                                                                                                                                                                                                                                                                                                                                                                                                                                                                                                                                                                                                                                                                                                                                                                                                                                                     |

|       |        |       |    |                                                                                                                                                                                                                                                                                                                                                                                                                                                                                                                                                                                                                                                                                                                                                                                                                                                                                                                                                                                                                                                                                                                                                                                                                                                                                                                                                                                                                                           |
|-------|--------|-------|----|-------------------------------------------------------------------------------------------------------------------------------------------------------------------------------------------------------------------------------------------------------------------------------------------------------------------------------------------------------------------------------------------------------------------------------------------------------------------------------------------------------------------------------------------------------------------------------------------------------------------------------------------------------------------------------------------------------------------------------------------------------------------------------------------------------------------------------------------------------------------------------------------------------------------------------------------------------------------------------------------------------------------------------------------------------------------------------------------------------------------------------------------------------------------------------------------------------------------------------------------------------------------------------------------------------------------------------------------------------------------------------------------------------------------------------------------|
|       |        |       |    | chemical synaptic transmission, germ cell development, neuroblast proliferation, learning or memory, retrograde axonal transport, adult locomotory behavior, protein secretion, transmission of nerve impulse, corpus callosum morphogenesis, hippocampus development, layer formation in cerebral cortex, neurogenesis, actin cytoskeleton organization, microtubule organizing center organization, osteoclast development, positive regulation of embryonic development, establishment of planar polarity of embryonic epithelium, regulation of GTPase activity, cortical microtubule organization, negative regulation of JNK cascade, vesicle transport along microtubule, brain morphogenesis, neuromuscular process controlling balance, nuclear envelope disassembly, cell division, maintenance of centrosome location, auditory receptor cell development, positive regulation of dendritic spine morphogenesis, regulation of microtubule cytoskeleton organization, cochlea development, microtubule cytoskeleton organization involved in establishment of planar polarity, regulation of microtubule motor activity.                                                                                                                                                                                                                                                                                                       |
| RAB8A | -0.307 | 0.311 | 33 | Vesicle docking involved in exocytosis, small GTPase mediated signal transduction, axonogenesis, protein secretion, cilium assembly, Golgi vesicle fusion to target membrane.<br>Endocytosis pathway.                                                                                                                                                                                                                                                                                                                                                                                                                                                                                                                                                                                                                                                                                                                                                                                                                                                                                                                                                                                                                                                                                                                                                                                                                                     |
| NEFM  | -0.303 | 0.340 | 33 | Axon development, mitophagy in response to mitochondrial depolarization.                                                                                                                                                                                                                                                                                                                                                                                                                                                                                                                                                                                                                                                                                                                                                                                                                                                                                                                                                                                                                                                                                                                                                                                                                                                                                                                                                                  |
| MYL9  | -0.298 | 0.126 | 12 | Signal transduction mechanisms, cytoskeleton, cell division and chromosome partitioning, calcium ion binding, myosin heavy chain binding, platelet aggregation.                                                                                                                                                                                                                                                                                                                                                                                                                                                                                                                                                                                                                                                                                                                                                                                                                                                                                                                                                                                                                                                                                                                                                                                                                                                                           |
| EGFR  | -0.297 | 0.135 | 14 | Cell, digestive tract and salivary gland morphogenesis, transmembrane receptor protein tyrosine kinase and epidermal growth factor receptor signaling pathways, learning or memory, cell proliferation, epidermis development, single organismal cell-cell adhesion, cerebral cortex cell migration, positive regulation of cell growth, positive regulation of cell migration, positive regulation of cyclin-dependent protein serine/threonine kinase activity involved in G1/S transition of mitotic cell cycle, positive regulation of catenin import into nucleus, negative regulation of protein catabolic process, negative regulation of apoptotic process, positive regulation of MAP kinase activity, positive regulation of nitric oxide biosynthetic process, positive regulation of DNA repair and replication, positive regulation of transcription, protein autophosphorylation, positive regulation of fibroblast and epithelial cell proliferation, regulation of peptidyl-tyrosine phosphorylation, regulation of nitric-oxide synthase activity, positive regulation of protein kinase B signaling, eyelid development in camera-type eye, response to UV-A, positive regulation of ERK1 and ERK2 cascade, cellular response to amino acid stimulus, epidermal growth factor stimulus and estradiol stimulus, positive regulation of production of miRNAs involved in gene silencing by miRNA. MAPK signaling pathway, |

|           |        |       |    |                                                                                                                                                                                                                                                                                                                                                                                                                                      |
|-----------|--------|-------|----|--------------------------------------------------------------------------------------------------------------------------------------------------------------------------------------------------------------------------------------------------------------------------------------------------------------------------------------------------------------------------------------------------------------------------------------|
|           |        |       |    | ErbB signaling pathway, Calcium signaling pathway, FoxO signaling pathway, Endocytosis, Dorso-ventral axis formation, Focal adhesion, Adherens junction, Gap junction, Regulation of actin cytoskeleton, GnRH signaling pathway.                                                                                                                                                                                                     |
| BRIP1     | -0.280 | 0.261 | 18 | DNA repair, regulation of transcription from RNA polymerase II promoter, DNA duplex unwinding.                                                                                                                                                                                                                                                                                                                                       |
| SPTBN1    | -0.279 | 0.168 | 15 | Mitotic cytokinesis, common-partner SMAD protein phosphorylation, SMAD protein import into nucleus, Golgi to plasma membrane protein transport, membrane assembly, protein targeting to plasma membrane, positive regulation of interleukin-2 secretion, positive regulation of protein localization to plasma membrane.                                                                                                             |
| DOCK5     | -0.276 | 0.192 | 12 | Small GTPase mediated signal transduction, negative regulation of vascular smooth muscle contraction, positive regulation of vascular associated smooth muscle cell migration.                                                                                                                                                                                                                                                       |
| NDUFA9    | -0.271 | 0.131 | 14 | Cell envelope biogenesis, outer membrane, carbohydrate transport and metabolism. Oxidative phosphorylation, Metabolic pathways.                                                                                                                                                                                                                                                                                                      |
| ADAM28    | -0.267 | 0.200 | 13 | Integral component of membrane, metalloendopeptidase activity, epidermal growth factor-like domain, peptidase M12B, ADAM/reprolysin, blood coagulation inhibitor EGF-like conserved site, disintegrin conserved site.                                                                                                                                                                                                                |
| KCTD9     | -0.265 | 0.239 | 11 | Protein homooligomerization.                                                                                                                                                                                                                                                                                                                                                                                                         |
| RTN4      | -0.260 | 0.129 | 13 | Axonogenesis, axonal fasciculation, endoplasmic reticulum membrane, endomembrane system, integral component of membrane.                                                                                                                                                                                                                                                                                                             |
| LOC415713 | -0.114 | 0.143 | 11 | Not well known.                                                                                                                                                                                                                                                                                                                                                                                                                      |
| GNRH1     | -0.252 | 0.159 | 14 | Reproduction, multicellular organism development, regulation of gene expression, positive regulation of luteinizing hormone secretion, response to alkaloid, response to ethanol, regulation of hormone biosynthetic process, response to steroid hormone, response to serotonin, regulation of ovarian follicle development, regulation of testosterone secretion, negative regulation of neuron migration. GnRH signaling pathway. |
| EBF2      | -0.251 | 0.305 | 31 | Cell fate determination, transcription, DNA-templated, regulation of transcription, DNA-templated, multicellular organism development, positive regulation of chromatin binding, positive regulation of transcription from RNA polymerase II promoter, brown fat cell differentiation, adipose tissue development.                                                                                                                   |
| ESRP2     | -0.235 | 0.118 | 15 | mRNA processing, regulation of RNA splicing, positive regulation of epithelial cell proliferation, epithelial tube branching involved in lung morphogenesis, branching involved in salivary gland morphogenesis.                                                                                                                                                                                                                     |
| WHSC1L1   | -0.232 | 0.124 | 11 | Chromatin structure and dynamics, zinc ion binding, histone-lysine N-methyltransferase activity. Lysine degradation.                                                                                                                                                                                                                                                                                                                 |
| STK17A    | -0.232 | 0.089 | 13 | Intracellular signal transduction, positive regulation of fibroblast apoptotic process, regulation of reactive oxygen species metabolic process.                                                                                                                                                                                                                                                                                     |
| NTF3      | -0.174 | 0.056 | 14 | Activation of MAPK activity, positive regulation of receptor internalization, transmembrane receptor protein                                                                                                                                                                                                                                                                                                                         |

|        |        |       |    |                                                                                                                                                                                                                                                                                                                                                                                                                                                                                                                                                                                                                                                           |
|--------|--------|-------|----|-----------------------------------------------------------------------------------------------------------------------------------------------------------------------------------------------------------------------------------------------------------------------------------------------------------------------------------------------------------------------------------------------------------------------------------------------------------------------------------------------------------------------------------------------------------------------------------------------------------------------------------------------------------|
|        |        |       |    | tyrosine kinase signaling pathway, cell-cell signaling, positive regulation of cell proliferation, positive regulation of cell migration, activation of protein kinase B activity, positive regulation of peptidyl-serine phosphorylation, regulation of apoptotic process, negative regulation of neuron apoptotic process, regulation of neuron differentiation and morphogenesis, regulation of peptidyl-tyrosine phosphorylation, induction of positive chemotaxis, activation of GTPase activity, positive regulation of actin cytoskeleton reorganization. MAPK pathway.                                                                            |
| DPYSL2 | -0.141 | 0.057 | 10 | Endocytosis, cytoskeleton organization, axon guidance, brain development, regulation of axon extension.                                                                                                                                                                                                                                                                                                                                                                                                                                                                                                                                                   |
| GRB2   | -0.112 | 0.036 | 16 | Insulin receptor signaling pathway, positive regulation of signal transduction, cell differentiation, positive regulation of actin filament polymerization, receptor internalization, signal transduction in response to DNA damage, regulation of MAPK cascade, anatomical structure formation involved in morphogenesis, cellular response to ionizing radiation, positive regulation of reactive oxygen species metabolic process. MAPK signaling pathway, ErbB signaling pathway, FoxO signaling pathway, Dorsal-ventral axis formation, Focal adhesion, Gap junction, Jak-STAT signaling pathway, Insulin signaling pathway, GnRH signaling pathway. |

1. Malomane DK, Simianer H, Weigend A, Reimer C, Schmitt AO, Weigend S. The SYNBREED chicken diversity panel : A global resource to assess chicken diversity at high genomic resolution. BMC Genomics; 2019;20:345.
2. Shao F, Wang X, Yu J, Jiang H, Zhu B, Gu Z. Expression of miR-33 from an SREBF2 intron targets the FTO gene in the chicken. PLoS One. 2014;9.
